# Supplementary material
Source: PubMed Central journal article supplement (PMC2776425)
Supplement: 0906412106_ST1_PDF.pdf [file 0906412106_ST1_PDF.pdf]

| <b>A- Analysis of ANIm and TETRA among the strains sharing specific name and for which a type strain is present (T)</b> |                                                                                     | TETRA          | ANIm         | TETRA   | ANIm  | TETRA | ANIm |
|-------------------------------------------------------------------------------------------------------------------------|-------------------------------------------------------------------------------------|----------------|--------------|---------|-------|-------|------|
| <b>T</b>                                                                                                                | Acidithiobacillus ferrooxidans ATCC 23270                                           | /              | /            |         |       |       |      |
|                                                                                                                         | Acidithiobacillus ferrooxidans ATCC 53993                                           | 0.99876        | 99.62        |         |       |       |      |
| <b>T</b>                                                                                                                | Anaeromyxobacter dehalogenans 2CP-1                                                 | /              | /            |         |       |       |      |
|                                                                                                                         | Anaeromyxobacter dehalogenans 2CP-C                                                 | <b>0.99945</b> | <b>93.49</b> |         |       |       |      |
|                                                                                                                         | Bacillus cereus 03BB102                                                             | <b>0.99903</b> | <b>91.98</b> |         |       |       |      |
|                                                                                                                         | Bacillus cereus AH187                                                               | <b>0.99884</b> | <b>92.15</b> |         |       |       |      |
|                                                                                                                         | Bacillus cereus AH820                                                               | <b>0.99891</b> | <b>92.03</b> |         |       |       |      |
|                                                                                                                         | Bacillus cereus ATCC 10987                                                          | <b>0.99902</b> | <b>91.96</b> |         |       |       |      |
| <b>T</b>                                                                                                                | Bacillus cereus ATCC 14579                                                          | /              | /            |         |       |       |      |
|                                                                                                                         | Bacillus cereus B4264                                                               | 0.99968        | 98.16        |         |       |       |      |
|                                                                                                                         | Bacillus cereus E33L                                                                | <b>0.99899</b> | <b>91.97</b> |         |       |       |      |
|                                                                                                                         | Bacillus cereus G9842                                                               | 0.99932        | 95.98        |         |       |       |      |
|                                                                                                                         | Bacillus cereus Q1                                                                  | <b>0.99889</b> | <b>92.12</b> |         |       |       |      |
|                                                                                                                         | Bacillus cereus subsp. cytotoxigen NVH 391-98                                       | <b>0.97949</b> | <b>85.33</b> |         |       |       |      |
|                                                                                                                         | Note: only strains B424 and G9842 belong to the same genospecies as the type strain |                |              |         |       |       |      |
| <b>T</b>                                                                                                                | Bacteroides fragilis NCTC 9343                                                      | /              | /            |         |       |       |      |
|                                                                                                                         | Bacteroides fragilis YCH46                                                          | 0.99947        | 99.17        |         |       |       |      |
| <b>T</b>                                                                                                                | Bifidobacterium animalis subsp. lactis BI-04                                        | /              | /            |         |       |       |      |
|                                                                                                                         | Bifidobacterium animalis subsp. lactis DSM 10140                                    | 1              | 99.97        |         |       |       |      |
|                                                                                                                         | Bifidobacterium_animalis_lactis_AD011                                               | 0.99993        | 99.95        |         |       |       |      |
| <b>T</b>                                                                                                                | Borrelia burgdorferi B31                                                            | /              | /            |         |       |       |      |
|                                                                                                                         | Borrelia burgdorferi ZS7                                                            | 0.99198        | 97.59        |         |       |       |      |
| <b>T</b>                                                                                                                | Burkholderia cenocepacia J2315                                                      | /              | /            | 0.99948 | 95.08 |       |      |
|                                                                                                                         | Burkholderia cenocepacia AU 1054                                                    | 0.99948        | 95.09        | /       | /     |       |      |
|                                                                                                                         | Burkholderia cenocepacia HI2424                                                     | 0.99951        | 95.1         | 0.99992 | 99.82 |       |      |
|                                                                                                                         | Burkholderia cenocepacia MCO-3                                                      | 0.99923        | 95.06        | 0.99962 | 97.92 |       |      |
| <b>T</b>                                                                                                                | Burkholderia mallei ATCC 23344                                                      | /              | /            |         |       |       |      |
|                                                                                                                         | Burkholderia mallei NCTC 10229                                                      | 0.99997        | 99.8         |         |       |       |      |
|                                                                                                                         | Burkholderia mallei NCTC 10247                                                      | 0.99997        | 99.79        |         |       |       |      |
|                                                                                                                         | Burkholderia mallei SAVP1                                                           | 0.9999         | 99.82        |         |       |       |      |
| <b>T</b>                                                                                                                | Caulobacter crescentus CB15                                                         | /              | /            |         |       |       |      |
|                                                                                                                         | Caulobacter crescentus NA1000                                                       | 0.99999        | 99.95        |         |       |       |      |
|                                                                                                                         | Chlamydomphila pneumoniae AR39                                                      | /              | /            |         |       |       |      |
|                                                                                                                         | Chlamydomphila pneumoniae CWL029                                                    | 0.99988        | 99.95        |         |       |       |      |
|                                                                                                                         | Chlamydomphila pneumoniae J138                                                      | 0.99986        | 99.95        |         |       |       |      |
| <b>T</b>                                                                                                                | Chlamydomphila pneumoniae TW-183                                                    | 0.99984        | 99.95        |         |       |       |      |
|                                                                                                                         | Chlamydia trachomatis 434/Bu                                                        | /              | /            |         |       |       |      |
| <b>T</b>                                                                                                                | Chlamydia trachomatis A/HAR-13                                                      | 0.99936        | 99.08        |         |       |       |      |
|                                                                                                                         | Chlamydia trachomatis D/UW-3/CX                                                     | 0.99931        | 99.14        |         |       |       |      |
|                                                                                                                         | Chlamydia trachomatis L2b/UCH-1/proctitis                                           | 0.99996        | 99.94        |         |       |       |      |
| <b>T</b>                                                                                                                | Chlorobium phaeobacteroides DSM 266                                                 | /              | /            |         |       |       |      |
|                                                                                                                         | Chlorobium phaeobacteroides BS1                                                     | <b>0.94269</b> | <b>87.72</b> |         |       |       |      |
| <b>T</b>                                                                                                                | Clostridium kluyveri DSM 555                                                        | /              | /            |         |       |       |      |
|                                                                                                                         | Clostridium kluyveri NBRC 12016                                                     | 0.99995        | 99.88        |         |       |       |      |
| <b>T</b>                                                                                                                | Clostridium perfringens ATCC 13124                                                  | /              | /            |         |       |       |      |
|                                                                                                                         | Clostridium perfringens SM101                                                       | 0.99649        | 97.15        |         |       |       |      |
|                                                                                                                         | Clostridium perfringens str. 13                                                     | 0.99917        | 98.47        |         |       |       |      |
| <b>T</b>                                                                                                                | Corynebacterium glutamicum ATCC 13032 (bielefeld)                                   | /              | /            |         |       |       |      |
|                                                                                                                         | Corynebacterium glutamicum ATCC 13032 (kitasato)                                    | 0.99997        | 99.92        |         |       |       |      |
|                                                                                                                         | Corynebacterium glutamicum R                                                        | 0.99827        | 97.67        |         |       |       |      |
| <b>T</b>                                                                                                                | Desulfitobacterium hafniense DCB-2                                                  | /              | /            |         |       |       |      |

|   |                                                                          |                |              |
|---|--------------------------------------------------------------------------|----------------|--------------|
|   | Desulfitobacterium hafniense Y51                                         | 0.9989         | 98.3         |
| T | Desulfovibrio vulgaris str. Hildenborough                                | /              | /            |
|   | Desulfovibrio vulgaris str. 'Miyazaki F'                                 | <b>0.78034</b> | <b>83.73</b> |
|   | Desulfovibrio vulgaris DP4                                               | 0.99972        | 98.77        |
|   | Ehrlichia ruminantium str. Gardel                                        | 0.99908        | 97.58        |
| T | Ehrlichia ruminantium str. Welgevonden (UPSA)                            | /              | /            |
|   | Ehrlichia ruminantium str. Welgevonden (CIRAD)                           | 0.99989        | 99.9         |
|   | Legionella pneumophila str. Corby                                        | 0.99877        | 96.75        |
|   | Legionella pneumophila str. Lens                                         | 0.99884        | 96.83        |
|   | Legionella pneumophila str. Paris                                        | 0.99866        | 96.95        |
| T | Legionella pneumophila subsp. pneumophila str. Philadelphia 1            | /              | /            |
| T | Leptospira biflexa serovar Patoc strain 'Patoc 1 (Ames)'                 | /              | /            |
|   | Leptospira biflexa serovar Patoc strain 'Patoc 1 (Paris)'                | 0.99999        | 99.99        |
|   | Mycobacterium tuberculosis CDC1551                                       | 0.99996        | 99.87        |
|   | Mycobacterium tuberculosis F11                                           | 0.99995        | 99.88        |
|   | Mycobacterium tuberculosis H37Ra                                         | 0.99995        | 99.88        |
|   | Mycobacterium tuberculosis KZN 1435                                      | 0.99998        | 99.91        |
| T | Mycobacterium tuberculosis H37Rv                                         | /              | /            |
| T | Mycoplasma hyopneumoniae J                                               | /              | /            |
|   | Mycoplasma hyopneumoniae 7448                                            | 0.99796        | 98.12        |
|   | Mycoplasma hyopneumoniae 232                                             | 0.9986         | 98.47        |
| T | Rhizobium etli CFN 42                                                    | /              | /            |
|   | Rhizobium etli CIAT 652                                                  | <b>0.99881</b> | <b>90.44</b> |
|   | Rickettsia bellii OSU 85-389                                             | 0.99986        | 99.52        |
| T | Rickettsia bellii RML369-C                                               | /              | /            |
| T | Rickettsia rickettsii str. 'Sheila Smith'                                | /              | /            |
|   | Rickettsia rickettsii str. Iowa                                          | 0.99992        | 99.86        |
| T | Rhodobacter sphaeroides 2.4.1                                            | /              | /            |
|   | Rhodobacter sphaeroides ATCC 17025                                       | <b>0.97495</b> | <b>87.63</b> |
|   | Rhodobacter sphaeroides ATCC 17029                                       | 0.99965        | 98.01        |
|   | Rhodobacter sphaeroides KD131                                            | 0.99947        | 97.25        |
|   | Salmonella enterica subsp. arizonae serovar 62:z4,z23:--                 | <b>0.99774</b> | <b>93.74</b> |
|   | Salmonella enterica subsp. enterica serovar Agona str. SL483             | 0.99959        | 98.68        |
|   | Salmonella enterica subsp. enterica serovar Choleraesuis str. SC-B67     | 0.99969        | 98.81        |
|   | Salmonella enterica subsp. enterica serovar Dublin str. CT_02021853      | 0.99988        | 98.87        |
|   | Salmonella enterica subsp. enterica serovar Enteritidis str. P125109     | 0.99968        | 98.92        |
|   | Salmonella enterica subsp. enterica serovar Gallinarum str. 287/91       | 0.99972        | 98.85        |
|   | Salmonella enterica subsp. enterica serovar Heidelberg str. SL476        | 0.99982        | 99.08        |
|   | Salmonella enterica subsp. enterica serovar Newport str. SL254           | 0.99964        | 98.95        |
|   | Salmonella enterica subsp. enterica serovar Paratyphi A str. AKU_12601   | 0.99966        | 98.55        |
|   | Salmonella enterica subsp. enterica serovar Paratyphi A str. ATCC 9150   | 0.99967        | 98.54        |
|   | Salmonella enterica subsp. enterica serovar Paratyphi B str. SPB7        | 0.99963        | 98.96        |
|   | Salmonella enterica subsp. enterica serovar Paratyphi C strain RKS4594   | 0.99979        | 98.86        |
|   | Salmonella enterica subsp. enterica serovar Schwarzengrund str. CVM19633 | 0.99977        | 98.47        |
|   | Salmonella enterica subsp. enterica serovar Typhi str. Ty2               | 0.99977        | 98.43        |
| T | Salmonella enterica subsp. enterica serovar Typhimurium str. LT2         | /              | /            |
|   | Thermus thermophilus HB27                                                | 0.99966        | 98.84        |
| T | Thermus thermophilus HB8                                                 | /              | /            |
|   | Tropheryma whipplei TW08/27                                              | 0.99953        | 99.16        |
| T | Tropheryma whipplei str. Twist                                           | /              | /            |
|   | Xanthomonas campestris pv. campestris str. 8004                          | 0.99994        | 99.82        |
| T | Xanthomonas campestris pv. campestris str. ATCC 33913 (LMG 658t)         | /              | /            |
|   | Xanthomonas campestris pv. campestris str. B100                          | 0.99979        | 98.71        |
|   | Xanthomonas campestris pv. vesicatoria str. 85-10                        | <b>0.99277</b> | <b>87.6</b>  |

**B- Analysis of ANIm and TETRA among the strains sharing specific name and for which no type strain is present. A reference strain has been used for the calculations (R)**

|   |                                                                                                                                                         |                |              |                |              |                |              |
|---|---------------------------------------------------------------------------------------------------------------------------------------------------------|----------------|--------------|----------------|--------------|----------------|--------------|
| R | Acinetobacter baumannii AB0057                                                                                                                          | /              | /            | <b>0.95369</b> | 97.87        |                |              |
|   | Acinetobacter baumannii AB307-0294                                                                                                                      | 0.99878        | 99.68        | <b>0.9529</b>  | 97.98        |                |              |
|   | Acinetobacter baumannii ACICU                                                                                                                           | 0.99876        | 97.83        | <b>0.95224</b> | 98.02        |                |              |
|   | Acinetobacter baumannii ATCC 17978                                                                                                                      | 0.99853        | 97.73        | <b>0.95246</b> | 97.97        |                |              |
|   | Acinetobacter baumannii AYE                                                                                                                             | 0.99951        | 99.7         | <b>0.95255</b> | 97.98        |                |              |
|   | Acinetobacter baumannii SDF                                                                                                                             | <b>0.95369</b> | 97.87        | /              | /            |                |              |
| R | Actinobacillus pleuropneumoniae L20                                                                                                                     | /              | /            |                |              |                |              |
|   | Actinobacillus pleuropneumoniae serovar 3 str. JL03                                                                                                     | 0.99965        | 98.38        |                |              |                |              |
|   | Actinobacillus pleuropneumoniae serovar 7 str. AP76                                                                                                     | 0.99943        | 98.36        |                |              |                |              |
| R | Anaplasma marginale str. Florida                                                                                                                        | /              | /            |                |              |                |              |
|   | Anaplasma marginale str. St. Maries                                                                                                                     | 0.99918        | 98.95        |                |              |                |              |
| R | Bacillus anthracis str. 'Ames Ancestor'                                                                                                                 | /              | /            |                |              |                |              |
|   | Bacillus anthracis str. Ames                                                                                                                            | 0.99985        | 99.92        |                |              |                |              |
|   | Bacillus anthracis CDC 684                                                                                                                              | 0.99999        | 99.9         |                |              |                |              |
|   | Bacillus anthracis str. Sterne                                                                                                                          | 0.99985        | 99.9         |                |              |                |              |
| R | Bacillus thuringiensis serovar konkukian str. 97-27                                                                                                     | /              | /            |                |              |                |              |
|   | Bacillus thuringiensis str. AI Hakam                                                                                                                    | 0.99965        | 97.59        |                |              |                |              |
| R | Bifidobacterium longum DJO10A                                                                                                                           | /              | /            |                |              |                |              |
|   | Bifidobacterium longum NCC2705                                                                                                                          | 0.99912        | 98.71        |                |              |                |              |
| R | Burkholderia pseudomallei 1106a                                                                                                                         | /              | /            |                |              |                |              |
|   | Burkholderia pseudomallei 1710b                                                                                                                         | 0.99983        | 99.2         |                |              |                |              |
|   | Burkholderia pseudomallei 668                                                                                                                           | 0.99992        | 98.88        |                |              |                |              |
|   | Burkholderia pseudomallei K96243                                                                                                                        | 0.99988        | 99.15        |                |              |                |              |
| R | Campylobacter jejuni RM1221                                                                                                                             |                |              |                |              |                |              |
|   | Campylobacter jejuni subsp. doylei 269.97                                                                                                               | 0.99712        | 96.08        |                |              |                |              |
|   | Campylobacter jejuni subsp. jejuni 81-176                                                                                                               | 0.9988         | 98.14        |                |              |                |              |
|   | Campylobacter jejuni subsp. jejuni 81116                                                                                                                | 0.99824        | 97.83        |                |              |                |              |
|   | Campylobacter jejuni subsp. jejuni NCTC 11168                                                                                                           | 0.99854        | 98.52        |                |              |                |              |
| R | Clavibacter michiganensis subsp. michiganensis NCPPB 382                                                                                                | /              | /            |                |              |                |              |
|   | Clavibacter michiganensis subsp. sepedonicus                                                                                                            | <b>0.99759</b> | <b>92.44</b> |                |              |                |              |
| R | Clostridium botulinum A str. ATCC 19397                                                                                                                 | /              | /            | <b>0.91685</b> | <b>84.74</b> | <b>0.90764</b> | <b>82.37</b> |
|   | Clostridium botulinum A str. ATCC 3502                                                                                                                  | 0.99989        | 99.84        | <b>0.91803</b> | <b>84.76</b> | <b>0.90887</b> | <b>82.37</b> |
|   | Clostridium botulinum A str. Hall                                                                                                                       | 0.99994        | 99.93        | <b>0.91545</b> | <b>84.76</b> | <b>0.90627</b> | <b>82.33</b> |
|   | Clostridium botulinum A2 str. Kyoto                                                                                                                     | 0.99913        | 97.8         | <b>0.92127</b> | <b>83.56</b> | <b>0.91172</b> | <b>83.09</b> |
|   | Clostridium botulinum A3 str. Loch Maree                                                                                                                | 0.9986         | 96.47        | <b>0.92309</b> | <b>83.22</b> | <b>0.91321</b> | <b>83.12</b> |
|   | Clostridium botulinum B str. Eklund 17B                                                                                                                 | <b>0.91685</b> | <b>84.74</b> | /              | /            | <b>0.99828</b> | <b>94.02</b> |
|   | Clostridium botulinum B1 str. Okra                                                                                                                      | 0.99907        | 97.44        | <b>0.92155</b> | <b>85.61</b> | <b>0.91212</b> | <b>83.11</b> |
|   | Clostridium botulinum E3 str. Alaska E43                                                                                                                | <b>0.90764</b> | <b>82.37</b> | <b>0.99828</b> | <b>94.02</b> | /              | /            |
|   | Clostridium botulinum F str. Langeland                                                                                                                  | 0.99944        | 97.47        | <b>0.91933</b> | <b>83.23</b> | <b>0.91008</b> | <b>83.01</b> |
|   | Note: strains Eklund 17B and Alaska E43 may be considered in the same genospecies, but different from that harbouring the rest of the strains analysed. |                |              |                |              |                |              |
| R | Coxiella burnetii CbuG_Q212                                                                                                                             | /              | /            |                |              |                |              |
|   | Coxiella burnetii CbuK_Q154                                                                                                                             | 0.99913        | 99.36        |                |              |                |              |
|   | Coxiella burnetii Dugway 5J108-111                                                                                                                      | 0.99926        | 99.42        |                |              |                |              |
|   | Coxiella burnetii RSA 331                                                                                                                               | 0.99923        | 99.42        |                |              |                |              |
|   | Coxiella burnetii RSA 493                                                                                                                               | 0.99978        | 99.47        |                |              |                |              |
| R | Desulfovibrio desulfuricans subsp. desulfuricans str. ATCC 27774                                                                                        | /              | /            |                |              |                |              |
|   | Desulfovibrio desulfuricans subsp. desulfuricans str. G20                                                                                               | <b>0.78456</b> | <b>82.72</b> |                |              |                |              |
| R | Escherichia coli 536                                                                                                                                    | /              | /            |                |              |                |              |
|   | Escherichia coli 55989                                                                                                                                  | 0.99924        | 97.06        |                |              |                |              |
|   | Escherichia coli APEC O1                                                                                                                                | 0.99941        | 98.77        |                |              |                |              |

|                                                                 |                |              |                |              |
|-----------------------------------------------------------------|----------------|--------------|----------------|--------------|
| Escherichia coli ATCC 8739                                      | 0.99855        | 97.18        |                |              |
| Escherichia coli CFT073                                         | 0.99955        | 98.78        |                |              |
| Escherichia coli E24377A                                        | 0.99892        | 97.0         |                |              |
| Escherichia coli ED1a                                           | 0.99875        | 98.75        |                |              |
| Escherichia coli HS                                             | 0.99849        | 97.15        |                |              |
| Escherichia coli IAI1                                           | 0.9984         | 97.16        |                |              |
| Escherichia coli IAI39                                          | 0.99904        | 97.5         |                |              |
| Escherichia coli O127:H6 str. E2348/69                          | 0.99934        | 98.57        |                |              |
| Escherichia coli O157:H7 EDL933                                 | 0.99779        | 97.04        |                |              |
| Escherichia coli O157:H7 str. EC4115                            | 0.99709        | 96.99        |                |              |
| Escherichia coli O157:H7 str. Sakai                             | 0.99764        | 96.99        |                |              |
| Escherichia coli S88                                            | 0.9996         | 98.69        |                |              |
| Escherichia coli SE11                                           | 0.9991         | 97.1         |                |              |
| Escherichia coli SMS-3-5                                        | 0.99947        | 97.42        |                |              |
| Escherichia coli UMN026                                         | 0.99898        | 97.19        |                |              |
| Escherichia coli UTI89                                          | 0.99967        | 98.9         |                |              |
| Escherichia coli str. K-12 substr. DH10B                        | 0.99847        | 97.19        |                |              |
| Escherichia coli str. K-12 substr. MG1655                       | 0.99844        | 97.15        |                |              |
| Escherichia coli str. K-12 substr. W3110                        | 0.99848        | 97.17        |                |              |
| Escherichia coli B str. REL606                                  | 0.99888        | 97.14        |                |              |
| Escherichia coli BL21                                           | 0.99824        | 97.17        |                |              |
| Escherichia coli BL21(DE3)                                      | 0.99823        | 97.18        |                |              |
| Escherichia coli BW2952                                         | 0.99865        | 97.16        |                |              |
| Escherichia coli O157:H7 str. TW14359                           | 0.99747        | 96.99        |                |              |
| <b>R</b> Francisella tularensis subsp. holarctica               | /              | /            |                |              |
| Francisella tularensis subsp. holarctica FTNF002-00             | 0.99989        | 99.89        |                |              |
| Francisella tularensis subsp. holarctica OSU18                  | 0.99993        | 99.87        |                |              |
| Francisella tularensis subsp. mediasiatica FSC147               | 0.99791        | 99.25        |                |              |
| Francisella tularensis subsp. tularensis FSC198                 | 0.99881        | 99.31        |                |              |
| Francisella tularensis subsp. tularensis SCHU S4                | 0.9988         | 99.31        |                |              |
| Francisella tularensis subsp. tularensis WY96-3418              | 0.99876        | 99.39        |                |              |
| <b>R</b> Haemophilus influenzae 86-028NP                        | /              | /            |                |              |
| Haemophilus influenzae PittEE                                   | 0.99899        | 97.3         |                |              |
| Haemophilus influenzae PittGG                                   | 0.9991         | 97.31        |                |              |
| Haemophilus influenzae Rd KW20                                  | 0.99869        | 97.36        |                |              |
| <b>R</b> Helicobacter pylori 26695                              | /              | /            |                |              |
| Helicobacter pylori G27                                         | 0.99962        | 95.36        |                |              |
| Helicobacter pylori HPAG1                                       | 0.99959        | 95.47        |                |              |
| Helicobacter pylori J99                                         | 0.99849        | 93.92        |                |              |
| Helicobacter pylori P12                                         | 0.99961        | 95.34        |                |              |
| Helicobacter pylori Shi470                                      | 0.99876        | 94.54        |                |              |
| Helicobacter pylori B38                                         | 0.99936        | 95.19        |                |              |
| <b>R</b> Klebsiella pneumoniae 342                              | /              | /            | <b>0.99878</b> | <b>94.76</b> |
| Klebsiella pneumoniae subsp. pneumoniae MGH 78578               | <b>0.99878</b> | <b>94.76</b> | /              | /            |
| Klebsiella pneumoniae NTUH-K2044                                | <b>0.99813</b> | <b>94.75</b> | 0.99936        | 99.18        |
| <b>R</b> Lactobacillus casei ATCC 334                           | /              | /            |                |              |
| Lactobacillus casei BL23                                        | 0.99746        | 98.68        |                |              |
| <b>R</b> Lactobacillus delbrueckii subsp. bulgaricus ATCC 11842 | /              | /            |                |              |
| Lactobacillus delbrueckii subsp. bulgaricus ATCC BAA-365        | 0.99978        | 99.02        |                |              |
| <b>R</b> Lactococcus lactis subsp. cremoris MG1363              | /              | /            |                |              |
| Lactococcus lactis subsp. cremoris SK11                         | 0.99773        | 97.97        |                |              |
| Lactococcus lactis subsp. lactis II1403                         | <b>0.99422</b> | <b>88.55</b> |                |              |
| <b>R</b> Lactobacillus plantarum WCFS1                          | /              | /            |                |              |
| Lactobacillus plantarum JDM1                                    | 0.99903        | 99.1         |                |              |

|   |                                                                       |                |              |                |              |                |              |
|---|-----------------------------------------------------------------------|----------------|--------------|----------------|--------------|----------------|--------------|
| R | <i>Leptospira borgpetersenii</i> serovar Hardjo-bovis JB197           | /              | /            |                |              |                |              |
|   | <i>Leptospira borgpetersenii</i> serovar Hardjo-bovis L550            | 0.99989        | 99.62        |                |              |                |              |
| R | <i>Leptospira interrogans</i> serovar Copenhageni str. Fiocruz L1-130 | /              | /            |                |              |                |              |
|   | <i>Leptospira interrogans</i> serovar Lai str. 56601                  | 0.99939        | 99.03        |                |              |                |              |
| R | <i>Listeria monocytogenes</i> EGD-e                                   | /              | /            | <b>0.99809</b> | <b>93.55</b> | <b>0.99885</b> | <b>94.86</b> |
|   | <i>Listeria monocytogenes</i> HCC23                                   | <b>0.99809</b> | <b>93.55</b> | /              | /            | <b>0.99868</b> | <b>95.08</b> |
|   | <i>Listeria monocytogenes</i> str. 4b F2365                           | <b>0.99885</b> | <b>94.86</b> | <b>0.99868</b> | <b>95.08</b> | /              | /            |
| R | <i>Methanococcus maripaludis</i> C5                                   | /              | /            | <b>0.99575</b> | <b>91.7</b>  | <b>0.99674</b> | <b>90.58</b> |
|   | <i>Methanococcus maripaludis</i> C6                                   | <b>0.9957</b>  | <b>90.9</b>  | /              | /            | <b>0.99834</b> | <b>90.92</b> |
|   | <i>Methanococcus maripaludis</i> C7                                   | <b>0.99655</b> | <b>89.69</b> | <b>0.99834</b> | <b>90.93</b> | /              | /            |
|   | <i>Methanococcus maripaludis</i> S2                                   | <b>0.96206</b> | <b>76.76</b> | <b>0.99242</b> | <b>89.02</b> | <b>0.99263</b> | <b>88.49</b> |
| R | <i>Methylobacterium extorquens</i> PA1                                | /              | /            |                |              |                |              |
|   | <i>Methylobacterium extorquens</i> AM1                                | 0.99669        | 96.94        |                |              |                |              |
|   | <i>Methylobacterium extorquens</i> DM4                                | 0.99934        | 97.03        |                |              |                |              |
| R | <i>Mycobacterium avium</i> 104                                        | /              | /            |                |              |                |              |
|   | <i>Mycobacterium avium</i> subsp. paratuberculosis K-10               | 0.99956        | 98.7         |                |              |                |              |
| R | <i>Mycobacterium bovis</i> AF2122/97                                  | /              | /            |                |              |                |              |
|   | <i>Mycobacterium bovis</i> BCG str. Pasteur 1173P2                    | 0.99998        | 99.91        |                |              |                |              |
|   | <i>Mycobacterium bovis</i> BCG str. Tokyo 172                         | 0.99998        | 99.91        |                |              |                |              |
| R | <i>Mycobacterium leprae</i> Br4923                                    | /              | /            |                |              |                |              |
|   | <i>Mycobacterium leprae</i> TN                                        |                | 1            | 99.98          |              |                |              |
| R | <i>Neisseria gonorrhoeae</i> FA 1090                                  | /              | /            |                |              |                |              |
|   | <i>Neisseria gonorrhoeae</i> NCCP11945                                | 0.99975        | 99.09        |                |              |                |              |
| R | <i>Neisseria meningitidis</i> 053442                                  | /              | /            |                |              |                |              |
|   | <i>Neisseria meningitidis</i> FAM18                                   | 0.99973        | 97.28        |                |              |                |              |
|   | <i>Neisseria meningitidis</i> MC58                                    | 0.99967        | 97.11        |                |              |                |              |
|   | <i>Neisseria meningitidis</i> Z2491                                   | 0.99967        | 97.18        |                |              |                |              |
| R | <i>Orientia tsutsugamushi</i> str. Boryong                            | /              | /            |                |              |                |              |
|   | <i>Orientia tsutsugamushi</i> str. Ikeda                              | 0.98609        | 94.49        |                |              |                |              |
| R | <i>Polynucleobacter necessarius</i> subsp. asymbioticus QLW-P1DMWA-1  | /              | /            |                |              |                |              |
|   | <i>Polynucleobacter necessarius</i> subsp. necessarius STIR1          | <b>0.97442</b> | <b>84.08</b> |                |              |                |              |
| R | <i>Pseudomonas aeruginosa</i> LESB58                                  | /              | /            |                |              |                |              |
|   | <i>Pseudomonas aeruginosa</i> PA7                                     | 0.9972         | 93.75        |                |              |                |              |
|   | <i>Pseudomonas aeruginosa</i> PAO1                                    | 0.99985        | 99.39        |                |              |                |              |
|   | <i>Pseudomonas aeruginosa</i> UCBPP-PA14                              | 0.99987        | 98.8         |                |              |                |              |
| R | <i>Pseudomonas fluorescens</i> Pf-5                                   | /              | /            |                |              |                |              |
|   | <i>Pseudomonas fluorescens</i> Pf0-1                                  | <b>0.92411</b> | <b>85.73</b> |                |              |                |              |
| R | <i>Pseudomonas putida</i> F1                                          | /              | /            | <b>0.99553</b> | <b>87.42</b> | <b>0.99039</b> | <b>87.4</b>  |
|   | <i>Pseudomonas putida</i> GB-1                                        | <b>0.99553</b> | <b>91.18</b> | /              | /            | <b>0.98982</b> | <b>87.42</b> |
|   | <i>Pseudomonas putida</i> KT2440                                      | 0.99912        | 97.06        | <b>0.99657</b> | <b>91.08</b> | <b>0.99091</b> | <b>87.33</b> |
|   | <i>Pseudomonas putida</i> W619                                        | <b>0.99091</b> | <b>87.96</b> | <b>0.98982</b> | <b>91.15</b> | /              | /            |
|   | Note: in this group only F1 and KT2440 belong to the same genospecies |                |              |                |              |                |              |
| R | <i>Pseudomonas syringae</i> pv. phaseolicola 1448A                    | /              | /            | <b>0.98859</b> | <b>89.67</b> | <b>0.98877</b> | <b>88.25</b> |
|   | <i>Pseudomonas syringae</i> pv. syringae B728a                        | <b>0.98859</b> | <b>89.67</b> | /              | /            | <b>0.99091</b> | <b>87.96</b> |
|   | <i>Pseudomonas syringae</i> pv. tomato str. DC3000                    | <b>0.98877</b> | <b>88.26</b> | <b>0.99091</b> | <b>87.96</b> | /              | /            |
| R | <i>Prochlorococcus marinus</i> str. AS9601                            | <b>0.94131</b> | <b>85.85</b> |                |              |                |              |
|   | <i>Prochlorococcus marinus</i> str. MIT 9211                          | <b>0.9293</b>  | <b>88.02</b> |                |              |                |              |
|   | <i>Prochlorococcus marinus</i> str. MIT 9215                          | <b>0.93891</b> | <b>87.22</b> |                |              |                |              |
|   | <i>Prochlorococcus marinus</i> str. MIT 9301                          | <b>0.94259</b> | <b>86.67</b> |                |              |                |              |
|   | <i>Prochlorococcus marinus</i> str. MIT 9303                          | <b>0.77552</b> | <b>93.07</b> |                |              |                |              |
|   | <i>Prochlorococcus marinus</i> str. MIT 9312                          | <b>0.94137</b> | <b>88.75</b> |                |              |                |              |
|   | <i>Prochlorococcus marinus</i> str. MIT 9313                          | <b>0.75482</b> | <b>93.04</b> |                |              |                |              |
|   | <i>Prochlorococcus marinus</i> str. MIT 9515                          | <b>0.94995</b> | <b>89.2</b>  |                |              |                |              |
|   | <i>Prochlorococcus marinus</i> str. NATL1A                            | <b>0.99802</b> | <b>97.18</b> |                |              |                |              |

|          |                                                                                                                                              |                |              |                |              |                |              |
|----------|----------------------------------------------------------------------------------------------------------------------------------------------|----------------|--------------|----------------|--------------|----------------|--------------|
| <b>R</b> | <i>Prochlorococcus marinus</i> str. NATL2A                                                                                                   | /              | /            |                |              |                |              |
|          | Note: none of the genomes analyzed shared values above 96% ANI all the genomes studied were distantly related with values ranging 93.8 – 82% |                |              |                |              |                |              |
| <b>R</b> | <i>Ralstonia eutropha</i> H16 (correct name <i>Cupriavidus pinatubonensis</i> )                                                              | /              | /            |                |              |                |              |
|          | <i>Ralstonia eutropha</i> JMP134 (correct name <i>Cupriavidus pinatubonensis</i> )                                                           | <b>0.96848</b> | <b>86.52</b> |                |              |                |              |
| <b>R</b> | <i>Ralstonia pickettii</i> 12J                                                                                                               | /              | /            |                |              |                |              |
|          | <i>Ralstonia pickettii</i> 12D                                                                                                               | 0.99918        | 95.98        |                |              |                |              |
| <b>R</b> | <i>Rhizobium leguminosarum</i> bv. trifolii WSM2304                                                                                          | /              | /            |                |              |                |              |
|          | <i>Rhizobium leguminosarum</i> bv. viciae 3841                                                                                               | <b>0.99783</b> | <b>89.34</b> |                |              |                |              |
| <b>R</b> | <i>Rhodopseudomonas palustris</i> BisA53                                                                                                     | /              | /            | <b>0.98269</b> | <b>84.86</b> | <b>0.9907</b>  | <b>85.93</b> |
|          | <i>Rhodopseudomonas palustris</i> BisB18                                                                                                     | <b>0.9907</b>  | <b>85.93</b> | <b>0.98061</b> | <b>84.65</b> | /              | /            |
|          | <i>Rhodopseudomonas palustris</i> BisB5                                                                                                      | <b>0.98576</b> | <b>85.31</b> | <b>0.9873</b>  | <b>86.16</b> | <b>0.98201</b> | <b>85.04</b> |
|          | <i>Rhodopseudomonas palustris</i> CGA009                                                                                                     | <b>0.98279</b> | <b>84.81</b> | 0.98931        | 97.82        | <b>0.98082</b> | <b>84.89</b> |
|          | <i>Rhodopseudomonas palustris</i> HaA2                                                                                                       | <b>0.98723</b> | <b>85.42</b> | <b>0.99969</b> | <b>86.18</b> | <b>0.98412</b> | <b>85.22</b> |
|          | <i>Rhodopseudomonas palustris</i> TIE-1                                                                                                      | <b>0.98269</b> | <b>84.86</b> | /              | /            | <b>0.98061</b> | <b>84.64</b> |
| <b>R</b> | <i>Shewanella baltica</i> OS155                                                                                                              | /              | /            |                |              |                |              |
|          | <i>Shewanella baltica</i> OS185                                                                                                              | 0.99877        | 96.9         |                |              |                |              |
|          | <i>Shewanella baltica</i> OS195                                                                                                              | 0.99876        | 96.81        |                |              |                |              |
|          | <i>Shewanella baltica</i> OS223                                                                                                              | 0.99856        | 97.1         |                |              |                |              |
| <b>R</b> | <i>Shigella boydii</i> CDC 3083-94                                                                                                           | /              | /            |                |              |                |              |
|          | <i>Shigella boydii</i> Sb227                                                                                                                 | 0.99815        | 99.54        |                |              |                |              |
| <b>R</b> | <i>Shigella flexneri</i> 2a str. 2457T                                                                                                       | /              | /            |                |              |                |              |
|          | <i>Shigella flexneri</i> 2a str. 301                                                                                                         | 0.99963        | 99.82        |                |              |                |              |
|          | <i>Shigella flexneri</i> 5 str. 8401                                                                                                         | 0.99991        | 99.73        |                |              |                |              |
| <b>R</b> | <i>Staphylococcus aureus</i> RF122                                                                                                           | /              | /            |                |              |                |              |
|          | <i>Staphylococcus aureus</i> subsp. <i>aureus</i> COL                                                                                        | 0.99922        | 97.89        |                |              |                |              |
|          | <i>Staphylococcus aureus</i> subsp. <i>aureus</i> JH1                                                                                        | 0.99887        | 97.85        |                |              |                |              |
|          | <i>Staphylococcus aureus</i> subsp. <i>aureus</i> JH9                                                                                        | 0.99886        | 97.85        |                |              |                |              |
|          | <i>Staphylococcus aureus</i> subsp. <i>aureus</i> MRSA252                                                                                    | 0.99893        | 97.7         |                |              |                |              |
|          | <i>Staphylococcus aureus</i> subsp. <i>aureus</i> MSSA476                                                                                    | 0.99928        | 97.96        |                |              |                |              |
|          | <i>Staphylococcus aureus</i> subsp. <i>aureus</i> MW2                                                                                        | 0.99933        | 97.97        |                |              |                |              |
|          | <i>Staphylococcus aureus</i> subsp. <i>aureus</i> Mu3                                                                                        | 0.99908        | 97.88        |                |              |                |              |
|          | <i>Staphylococcus aureus</i> subsp. <i>aureus</i> Mu50                                                                                       | 0.99908        | 97.87        |                |              |                |              |
|          | <i>Staphylococcus aureus</i> subsp. <i>aureus</i> N315                                                                                       | 0.99919        | 97.94        |                |              |                |              |
|          | <i>Staphylococcus aureus</i> subsp. <i>aureus</i> NCTC 8325                                                                                  | 0.99939        | 97.87        |                |              |                |              |
|          | <i>Staphylococcus aureus</i> subsp. <i>aureus</i> USA300_FPR3757                                                                             | 0.99897        | 97.88        |                |              |                |              |
|          | <i>Staphylococcus aureus</i> subsp. <i>aureus</i> USA300_TCH1516                                                                             | 0.99904        | 97.87        |                |              |                |              |
|          | <i>Staphylococcus aureus</i> subsp. <i>aureus</i> str. Newman                                                                                | 0.99914        | 97.81        |                |              |                |              |
| <b>R</b> | <i>Staphylococcus epidermidis</i> ATCC 12228                                                                                                 | /              | /            |                |              |                |              |
|          | <i>Staphylococcus epidermidis</i> RP62A                                                                                                      | 0.99851        | 99.24        |                |              |                |              |
| <b>R</b> | <i>Stenotrophomonas maltophilia</i> K279a                                                                                                    | /              | /            |                |              |                |              |
|          | <i>Stenotrophomonas maltophilia</i> R551-3                                                                                                   | <b>0.99849</b> | <b>91.35</b> |                |              |                |              |
|          | Note: both strains do not belong to the same genospecies                                                                                     |                |              |                |              |                |              |
| <b>R</b> | <i>Streptococcus agalactiae</i> 2603V/R                                                                                                      | /              | /            |                |              |                |              |
|          | <i>Streptococcus agalactiae</i> A909                                                                                                         | 0.99897        | 99.43        |                |              |                |              |
|          | <i>Streptococcus agalactiae</i> NEM316                                                                                                       | 0.99797        | 99.41        |                |              |                |              |
| <b>R</b> | <i>Streptococcus equi</i> subsp. <i>equi</i> 4047                                                                                            | /              | /            |                |              |                |              |
|          | <i>Streptococcus equi</i> subsp. <i>zooepidemicus</i>                                                                                        | 0.99638        | 96.8         |                |              |                |              |
|          | <i>Streptococcus equi</i> subsp. <i>zooepidemicus</i> MGCS10565                                                                              | 0.99416        | 96.82        |                |              |                |              |
| <b>R</b> | <i>Streptococcus pneumoniae</i> 70585                                                                                                        | /              | /            |                |              |                |              |
|          | <i>Streptococcus pneumoniae</i> ATCC 700669                                                                                                  | 0.99836        | 98.43        |                |              |                |              |
|          | <i>Streptococcus pneumoniae</i> CGSP14                                                                                                       | 0.99843        | 98.42        |                |              |                |              |
|          | <i>Streptococcus pneumoniae</i> D39                                                                                                          | 0.99853        | 98.47        |                |              |                |              |
|          | <i>Streptococcus pneumoniae</i> G54                                                                                                          | 0.99855        | 98.48        |                |              |                |              |

|          |                                                         |         |       |
|----------|---------------------------------------------------------|---------|-------|
|          | <i>Streptococcus pneumoniae</i> Hungary19A-6            | 0.9978  | 98.23 |
|          | <i>Streptococcus pneumoniae</i> JJA                     | 0.99918 | 98.44 |
|          | <i>Streptococcus pneumoniae</i> P1031                   | 0.99877 | 98.58 |
|          | <i>Streptococcus pneumoniae</i> R6                      | 0.99853 | 98.47 |
|          | <i>Streptococcus pneumoniae</i> TIGR4                   | 0.99784 | 98.45 |
|          | <i>Streptococcus pneumoniae</i> Taiwan19F-14            | 0.9983  | 98.4  |
| <b>R</b> | <i>Streptococcus pyogenes</i> M1 GAS                    | /       | /     |
|          | <i>Streptococcus pyogenes</i> MGAS10270                 | 0.99888 | 98.74 |
|          | <i>Streptococcus pyogenes</i> MGAS10394                 | 0.99872 | 98.5  |
|          | <i>Streptococcus pyogenes</i> MGAS10750                 | 0.99899 | 98.65 |
|          | <i>Streptococcus pyogenes</i> MGAS2096                  | 0.99789 | 98.84 |
|          | <i>Streptococcus pyogenes</i> MGAS315                   | 0.99846 | 98.69 |
|          | <i>Streptococcus pyogenes</i> MGAS5005                  | 0.99979 | 99.81 |
|          | <i>Streptococcus pyogenes</i> MGAS6180                  | 0.99923 | 98.81 |
|          | <i>Streptococcus pyogenes</i> MGAS8232                  | 0.99846 | 98.46 |
|          | <i>Streptococcus pyogenes</i> MGAS9429                  | 0.99938 | 98.78 |
|          | <i>Streptococcus pyogenes</i> NZ131                     | 0.99937 | 98.76 |
|          | <i>Streptococcus pyogenes</i> SSI-1                     | 0.99845 | 98.66 |
|          | <i>Streptococcus pyogenes</i> str. Manfredo             | 0.99903 | 98.56 |
| <b>R</b> | <i>Streptococcus suis</i> 05ZYH33                       | /       | /     |
|          | <i>Streptococcus suis</i> 98HAH33                       | 0.99992 | 99.62 |
|          | <i>Streptococcus suis</i> BM407                         | 0.99962 | 99.58 |
|          | <i>Streptococcus suis</i> P1/7                          | 0.99963 | 99.74 |
|          | <i>Streptococcus suis</i> SC84                          | 0.9999  | 99.76 |
| <b>R</b> | <i>Streptococcus thermophilus</i> CNRZ1066              | /       | /     |
|          | <i>Streptococcus thermophilus</i> LMD-9                 | 0.99915 | 98.79 |
|          | <i>Streptococcus thermophilus</i> LMG 18311             | 0.99963 | 99.42 |
| <b>R</b> | <i>Synechococcus elongatus</i> PCC 6301                 | 0.99997 | 99.91 |
|          | <i>Synechococcus elongatus</i> PCC 7942                 | /       | /     |
| <b>R</b> | <i>Treponema pallidum</i> subsp. pallidum SS14          | /       | /     |
|          | <i>Treponema pallidum</i> subsp. pallidum str. Nichols  | 0.99994 | 99.92 |
| <b>R</b> | <i>Vibrio cholerae</i> O1 biovar El Tor str. N16961     | /       | /     |
|          | <i>Vibrio cholerae</i> M66_2                            | 0.99982 | 99.79 |
|          | <i>Vibrio cholerae</i> O395                             | 0.99942 | 99.34 |
| <b>R</b> | <i>Vibrio fischeri</i> ES114                            | /       | /     |
|          | <i>Vibrio fischeri</i> MJ11                             | 0.9991  | 95.82 |
| <b>R</b> | <i>Vibrio vulnificus</i> CMCP6                          | /       | /     |
|          | <i>Vibrio vulnificus</i> YJ016                          | 0.99954 | 98.31 |
| <b>R</b> | <i>Xanthomonas oryzae</i> pv. <i>oryzae</i> KACC10331   | /       | /     |
|          | <i>Xanthomonas oryzae</i> pv. <i>oryzae</i> MAFF 311018 | 0.99988 | 99.1  |
|          | <i>Xanthomonas oryzae</i> pv. <i>oryzae</i> PXO99A      | 0.99956 | 98.88 |
| <b>R</b> | <i>Xylella fastidiosa</i> 9a5c                          | /       | /     |
|          | <i>Xylella fastidiosa</i> M12                           | 0.99574 | 96.03 |
|          | <i>Xylella fastidiosa</i> M23                           | 0.99574 | 95.71 |
|          | <i>Xylella fastidiosa</i> Temecula1                     | 0.99588 | 95.68 |
| <b>R</b> | <i>Yersinia pestis</i> Angola                           | /       | /     |
|          | <i>Yersinia pestis</i> Antiqua                          | 0.99921 | 99.83 |
|          | <i>Yersinia pestis</i> CO92                             | 0.99964 | 99.81 |
|          | <i>Yersinia pestis</i> KIM                              | 0.99956 | 99.82 |
|          | <i>Yersinia pestis</i> Nepal516                         | 0.99962 | 99.81 |
|          | <i>Yersinia pestis</i> Pestoides F                      | 0.99934 | 99.79 |
|          | <i>Yersinia pestis</i> biovar Microtus str. 91001       | 0.99937 | 99.8  |
| <b>R</b> | <i>Yersinia pseudotuberculosis</i> IP 31758             | /       | /     |
|          | <i>Yersinia pseudotuberculosis</i> IP 32953             | 0.99968 | 98.98 |

Yersinia pseudotuberculosis PB1/+  
Yersinia pseudotuberculosis YPIII

0.99961 98.96  
0.99958 99.03
