# Supplementary material
Source: PubMed Central journal article supplement (PMC2776425)
Supplement: 0906412106_ST2_PDF.pdf [file 0906412106_ST2_PDF.pdf]

Table S2: List of species with a single representative in the genome database, and where the type strain is the sequenced organism (A). Species names with a single representative in the genome database, but for which the sequenced strain does not correspond to the type strain and there is no guarantee that the sequenced strain represents the named taxon (B). And species names that have never been validly published (C).

**A- Species names with a single representative in the genome database, and where the type strain is the sequenced organism:**

Actinobacillus succinogenes 130Z  
Acholeplasma laidlawii PG-8A  
Acidobacterium capsulatum ATCC 51196  
Acidothermus cellulolyticus 11B  
Aeromonas hydrophila subsp. hydrophila ATCC 7966  
Aeropyrum pernix K1  
Akkermansia muciniphila ATCC BAA-835  
Alcanivorax borkumensis SK2  
Alkalilimnicola ehrlichii MLHE-1  
Alkaliphilus oremlandii OhILAs  
Archaeoglobus fulgidus DSM 4304  
Arthrobacter chlorophenolicus A6  
Azorhizobium caulinodans ORS 571  
Bacillus licheniformis ATCC 14580  
Bacteroides thetaiotaomicron VPI-5482  
Bacteroides vulgatus ATCC 8482  
Bartonella bacilliformis KC583  
Bartonella henselae str. Houston-1  
Bartonella tribocorum CIP 105476  
Bdellovibrio bacteriovorus HD100  
Beijerinckia indica subsp. indica ATCC 9039  
Beutenbergia cavernae DSM 12333  
Bifidobacterium adolescentis ATCC 15703  
Bifidobacterium longum subsp. infantis ATCC 15697  
Bordetella petrii DSM 12804  
Brucella canis ATCC 23365  
Brucella melitensis 16M  
Brucella ovis ATCC 25840  
Brucella suis 1330  
Burkholderia phymatum STM815  
Burkholderia phytofirmans PsJN  
Burkholderia thailandensis E264  
Burkholderia xenovorans LB400  
Caldicellulosiruptor saccharolyticus DSM 8903  
Caldivirga maquilensis IC-167  
Campylobacter hominis ATCC BAA  
Carboxydotherrmus hydrogenoformans Z-2901  
Cellvibrio japonicus Ueda107  
Chlamydophila caviae GPIC  
Chlorobium limicola DSM 245  
Chlorobium tepidum TLS  
Chloroflexus aggregans DSM 9485  
Chloroflexus aurantiacus J-10-fl  
Chloroherpeton thalassium ATCC 35110  
Chromobacterium violaceum ATCC 12472  
Chromohalobacter salexigens DSM 3043

*Clostridium acetobutylicum* ATCC 824  
*Clostridium beijerinckii* NCIMB 8052  
*Clostridium cellulolyticum* H10  
*Clostridium phytofermentans* ISDg  
*Clostridium thermocellum* ATCC 27405  
*Coprothermobacter proteolyticus* DSM 5265  
*Corynebacterium aurimucosum* ATCC 700975 (real name *C. nigricans*)  
*Corynebacterium efficiens* YS-314  
*Corynebacterium kroppenstedtii* DSM 44385  
*Corynebacterium urealyticum* DSM 7109  
*Cytophaga hutchinsonii* ATCC 33406  
*Deinococcus deserti* VCD115  
*Deinococcus geothermalis* DSM 11300  
*Deinococcus radiodurans* R1  
*Desulfobacterium autotrophicum* HRM2  
*Desulfovibrio magneticus* RS-1  
*Desulfotalea psychrophila* LSV54  
*Desulfurococcus kamchatkensis* 1221n  
*Dictyoglomus thermophilum* H-6-12  
*Dictyoglomus turgidum* DSM 6724  
*Dinoroseobacter shibae* DFL 12  
*Ehrlichia chaffeensis* str. Arkansas  
*Erwinia tasmaniensis* Et1/99  
*Eubacterium eligens* ATCC 27750  
*Eubacterium rectale* ATCC 33656  
*Exiguobacterium sibiricum* 255-15  
*Fervidobacterium nodosum* Rt17-B1  
*Francisella novicida* U112  
*Fusobacterium nucleatum* subsp. *nucleatum* ATCC 25586  
*Gemmatimonas aurantiaca* T-27  
*Geobacter bemidjiensis* Bem  
*Geobacter metallireducens* GS-15  
*Geobacter sulfurreducens* PCA  
*Geobacter uraniireducens* Rf4  
*Gloeobacter violaceus* PCC 7421  
*Gluconacetobacter diazotrophicus* PAI 5  
*Granulibacter bethesdensis* CGDNIH1  
*Hahella chejuensis* KCTC 2396  
*Haloarcula marismortui* ATCC 43049  
*Halorhodospira halophila* SL1  
*Halorubrum lacusprofundi* ATCC 49239  
*Halothermothrix orenii* H 168  
*Herpetosiphon aurantiacus* ATCC 23779  
*Hirschia baltica* ATCC 49814  
*Hyperthermus butylicus* DSM 5456  
*Hyphomonas neptunium* ATCC 15444  
*Idiomarina loihiensis* L2TR  
*Ignicoccus hospitalis* KIN4/I  
*Kineococcus radiotolerans* SRS30216  
*Lactobacillus gasseri* ATCC 33323  
*Lactobacillus reuteri* DSM 20016  
*Lactobacillus sakei* subsp. *sakei* 23K  
*Leuconostoc mesenteroides* subsp. *mesenteroides* ATCC 8293  
*Listeria welshimeri* serovar 6b str. SLCC5334

Marinobacter aquaeolei VT8  
Mesoplasma florum L1  
Metallosphaera sedula DSM 5348  
Methanobrevibacter smithii ATCC 35061  
Methanocaldococcus jannaschii DSM 2661  
Methanococcoides burtonii DSM 6242  
Methanococcus aeolicus Nankai-3  
Methanococcus vannielii SB  
Methanocorpusculum labreanum Z  
Methanoculleus marisnigri JR1  
Methanopyrus kandleri AV19  
Methanosaeta thermophila PT  
Methanosarcina acetivorans C2A  
Methanosphaera stadtmanae DSM 3091  
Methanosphaerula palustris E1-9c  
Methanospirillum hungatei JF-1  
Methanothermobacter thermautotrophicus str. Delta H  
Methylibium petroleiphilum PM1  
Methylobacillus flagellatus KT  
Methylobacterium chloromethanicum CM4  
Methylobacterium nodulans ORS 2060  
Methylobacterium populi BJ001  
Methylobacterium radiotolerans JCM 2831  
Methylocella silvestris BL2  
Methylothermobacter mobilis JLW8  
Micrococcus luteus NCTC 2665  
Microcystis aeruginosa NIES-843  
Mycobacterium vanbaalenii PYR-1  
Mycoplasma agalactiae PG2  
Mycoplasma capricolum subsp. capricolum ATCC 27343  
Mycoplasma genitalium G37  
Mycoplasma mobile 163K  
Mycoplasma mycoides subsp. mycoides SC str. PG1  
Natranaerobius thermophilus JW/NM-WN-LF  
Natronomonas pharaonis DSM 2160  
Nautilia profundicola AmH  
Neorickettsia risticii str. Illinois  
Neorickettsia sennetsu str. Miyayama  
Nitrobacter hamburgensis X14  
Nitrobacter winogradskyi Nb-255  
Nitrosococcus oceani ATCC 19707  
Nitrospira multiformis ATCC 25196  
Novosphingobium aromaticivorans DSM 12444  
Oceanobacillus iheyensis HTE831  
Ochrobactrum anthropi ATCC 49188  
Oligotropha carboxidovorans OM5  
Parabacteroides distasonis ATCC 8503  
Parvibaculum lavamentivorans DS-1  
Pelobacter carbinolicus DSM 2380  
Pelobacter propionicus DSM 2379  
Pelodictyon luteolum DSM 273  
Pelodictyon phaeoclathratiforme BU-1  
Pelotomaculum thermopropionicum SI  
Persephonella marina EX-H1

*Petrogoba mobilis* SJ95  
*Photorhabdus luminescens* subsp. *laumondii* TTO1  
*Picrophilus torridus* DSM 9790  
*Polaromonas naphthalenivorans* CJ2  
*Prochlorococcus marinus* subsp. *marinus* str. CCMP1375  
*Prosthecochloris aestuarii* DSM 271  
*Psychrobacter arcticus* 273-4  
*Psychrobacter cryohalolentis* K5  
*Psychromonas ingrahamii* 37  
*Pyrobaculum aerophilum* str. IM2  
*Pyrobaculum arsenaticum* DSM 13514  
*Pyrobaculum calidifontis* JCM 11548  
*Pyrobaculum islandicum* DSM 4184  
*Pyrococcus furiosus* DSM 3638  
*Pyrococcus horikoshii* OT3  
*Ralstonia metallidurans* CH34  
*Renibacterium salmoninarum* ATCC 33209  
*Rhodoferax ferrireducens* T118  
*Rhodopirellula baltica* SH 1  
*Rhodospirillum rubrum* ATCC 11170  
*Rickettsia conorii* str. Malish 7  
*Roseiflexus castenholzii* DSM 13941  
*Roseobacter denitrificans* OCh 114  
*Rubrobacter xylanophilus* DSM 9941  
*Ruegeria pomeroyi* DSS-3  
*Saccharophagus degradans* 2-40  
*Saccharopolyspora erythraea* NRRL 2338  
*Salinibacter ruber* DSM 13855  
*Salinispora tropica* CNB-440  
*Sphingomonas wittichii* RW1  
*Sphingopyxis alaskensis* RB2256  
*Shewanella amazonensis* SB2B  
*Shewanella denitrificans* OS217  
*Shewanella halifaxensis* HAW-EB4  
*Shewanella loihica* PV-4  
*Shewanella oneidensis* MR-1  
*Shewanella pealeana* ATCC 700345  
*Shewanella piezotolerans* WP3  
*Shewanella sediminis* HAW-EB3  
*Shewanella woodyi* ATCC 51908  
*Staphylococcus saprophyticus* subsp. *saprophyticus* ATCC 15305  
*Staphylothermus marinus* F1  
*Streptomyces avermitilis* MA-4680  
*Sulfolobus acidocaldarius* DSM 639  
*Sulfolobus tokodaii* str. 7  
*Sulfurihydrogenibium azorense* Az  
*Sulfurimonas denitrificans* DSM 1251  
*Symbiobacterium thermophilum* IAM 14863  
*Syntrophobacter fumaroxidans* MPOB  
*Syntrophomonas wolfei* subsp. *wolfei* str. Goettingen  
*Syntrophus aciditrophicus* SB  
*Thermoanaerobacter pseudethanolicus* ATCC 33223  
*Thermoanaerobacter tengcongensis* MB4  
*Thermococcus gammatolerans* EJ3

Thermococcus kodakarensis KOD1  
Thermococcus sibiricus MM 739  
Thermodesulfovibrio yellowstonii DSM 11347  
Thermomicrobium roseum DSM 5159  
Thermoplasma acidophilum DSM 1728  
Thermoplasma volcanium GSS1  
Thermoproteus neutrophilus V24Sta  
Thermosipho melanesiensis BI429  
Thermotoga lettingae TMO  
Thermotoga maritima MSB8  
Thermotoga neapolitana DSM 4359  
Thermotoga petrophila RKU-1  
Tolomonas auensis DSM 9187  
Treponema denticola ATCC 35405  
Verminephrobacter eiseniae EF01-2  
Wolinella succinogenes DSM 1740

**B- Species names with a single representative in the genome database, but for which the sequenced strain does not correspond to the type strain, or the strain name given does not match any of the strain numbers given at the Strain Info web site. There is no guarantee that the sequenced strain represents the named taxon:**

Aeromonas salmonicida subsp. salmonicida A449  
Acidiphilium cryptum JF-5  
Acidovorax citrulli AAC00-1  
Acidovorax sp. JS42  
Acinetobacter sp. ADP1  
Agrobacterium radiobacter K84 (Rhizobium radiobacter)  
Agrobacterium tumefaciens str. C58  
Agrobacterium vitis S4  
Aggregatibacter aphrophilus NJ8700  
Aliivibrio salmonicida LFI1238  
Alteromonas macleodii 'Deep ecotype'  
Anabaena variabilis ATCC 29413  
Anaplasma phagocytophilum HZ  
Anoxybacillus flavithermus WK1  
Arcobacter butzleri RM4018  
Arthrobacter aurescens TC1  
Arthrobacter sp. FB24  
Aster yellows witches'-broom phytoplasma AYWB  
Azoarcus sp. BH72  
Azotobacter vinelandii DJ  
Bacillus anthracis str. A0248  
Bacillus anthracis str. CDC 684  
Bacillus amyloliquefaciens FZB42  
Bacillus clausii KSM-K16  
Bacillus halodurans C-125  
Bacillus pumilus SAFR-032  
Bacillus subtilis subsp. subtilis str. 168  
Bacillus weihenstephanensis KBAB4  
Bartonella grahamii as4aup

Bartonella quintana str. Toulouse  
Bifidobacterium animalis subsp. lactis AD011  
Bordetella avium 197N  
Bordetella bronchiseptica RB50  
Bordetella parapertussis 12822  
Bordetella pertussis Tohama I  
Borrelia afzelii PKo  
Borrelia garinii PBi  
Brachyspira hyodysenteriae WA1  
Bradyrhizobium japonicum USDA 110  
Brevibacillus brevis NBRC 100599  
Brucella abortus S19 (later heterotypic synonym of B. melitensis)  
Brucella abortus bv. 1 str. 9-941 (later heterotypic synonym of B. melitensis)  
Brucella melitensis ATCC 23457 biovar 2  
Brucella melitensis biovar Abortus 2308  
Brucella suis ATCC 23445 (later heterotypic synonym of B. melitensis)  
Burkholderia sp. 383  
Burkholderia glumae BGR1  
Burkholderia vietnamiensis G4  
Campylobacter concisus 13826  
Campylobacter curvus 525.92  
Campylobacter fetus subsp. fetus 82-40  
Campylobacter lari RM2100  
Chlamydia muridarum Nigg  
Chlamydophila abortus S26/3  
Chlamydophila felis Fe/C-56  
Chlorobaculum parvum NCIB 8327 (in strain info it is labelled as the type of Thiobacillus denitrificans, but according to LPSN it is a wrong label. In any case it seems that it is not corresponding to the name C. parvum)  
Citrobacter koseri ATCC BAA-895  
Clostridium botulinum Ba4 str. 657  
Clostridium difficile 630  
Clostridium novyi NT  
Clostridium tetani E88  
Colwellia psychrerythraea 34H  
Corynebacterium diphtheriae NCTC 13129  
Corynebacterium jeikeium K411  
Cronobacter sakazakii ATCC BAA-894  
Cupriavidus taiwanensis  
Cyanospora sp. ATCC 51142  
Cyanospora sp. PCC 7424  
Cyanospora sp. PCC 7425  
Cyanospora sp. PCC 8801  
Delftia acidovorans SPH-1  
Desulfatibacillum alkenivorans AK-01  
Diaphorobacter sp. TPSY  
Dichelobacter nodosus VCS1703A  
Dickeya dadantii Ech703  
Dickeya zeae Ech1591  
Edwardsiella ictaluri 93-146  
Enterobacter sp. 638  
Enterococcus faecalis V583  
Erythrobacter litoralis HTCC2594

Exiguobacterium sp. AT1b  
Finegoldia magna ATCC 29328  
Flavobacterium johnsoniae UW101  
Flavobacterium psychrophilum JIP02/86  
Francisella philomiragia subsp. philomiragia ATCC 25017  
Frankia alni ACN14a (no type strain designated in the original description)  
Frankia sp. Ccl3  
Frankia sp. EAN1pec  
Geobacillus kaustophilus HTA426  
Geobacillus thermodenitrificans NG80-2  
Geobacillus sp. WCH70  
Gluconobacter oxydans 621H  
Geobacter sp. M21  
Haemophilus ducreyi 35000HP  
Haemophilus parasuis SH0165  
Halobacterium salinarum R1  
Halobacterium sp. NRC-1  
Haloquadratum walsbyi DSM 16790  
Helicobacter acinonychis str. Sheeba  
Helicobacter hepaticus ATCC 51449  
Herminiimonas arsenicoxydans  
Hydrogenobaculum sp. Y04AAS1  
Jannaschia sp. CCS1  
Janthinobacterium sp. Marseille  
Kocuria rhizophila DC2201  
Lactobacillus acidophilus NCFM  
Lactobacillus brevis ATCC 367  
Lactobacillus fermentum IFO 3956  
Lactobacillus helveticus DPC 4571  
Lactobacillus johnsonii NCC 533  
Lactobacillus salivarius UCC118  
Laribacter hongkongensis HLHK9  
Lawsonia intracellularis PHE/MN1-00  
Leifsonia xyli subsp. xyli str. CTCB07  
Leptothrix cholodnii SP-6  
Leuconostoc citreum KM20  
Listeria innocua Clip11262  
Lysinibacillus sphaericus C3-41  
Macrococcus caseolyticus JCSC5402  
Magnetococcus sp. MC-1  
Maricaulis maris MCS10  
Marinomonas sp. MWYL1  
Mesorhizobium loti MAFF303099  
Mesorhizobium sp. BNC1  
Methanosarcina barkeri str. Fusaro  
Methanosarcina mazei Go1  
Methylobacterium sp. 4-46  
Methylococcus capsulatus str. Bath  
Methylovorus sp. SIP3-4  
Moorella thermoacetica ATCC 39073  
Mycobacterium abscessus  
Mycobacterium gilvum PYR-GCK  
Mycobacterium marinum M  
Mycobacterium smegmatis str. MC2 155

*Mycobacterium ulcerans* Agy99  
*Mycoplasma arthritis* 158L3-1  
*Mycoplasma conjunctivae*  
*Mycoplasma gallisepticum* R  
*Mycoplasma penetrans* HF-2  
*Mycoplasma pneumoniae* M129  
*Mycoplasma pulmonis* UAB CTIP  
*Mycoplasma synoviae* 53  
*Myxococcus xanthus* DK 1622  
*Nitratiruptor* sp. SB155-2  
*Nitrosomonas europaea* ATCC 19718  
*Nitrosomonas eutropha* C91 (never validly published name according LPSN)  
*Nocardia farcinica* IFM 10152  
*Nocardioides* sp. JS614  
*Nostoc* sp. PCC 7120  
*Oenococcus oeni* PSU-1  
*Opitutus terrae* PB90-1  
*Paracoccus denitrificans* PD1222  
*Pasteurella multocida* subsp. *multocida* str. Pm70  
*Pectobacterium atrosepticum* SCRI1043  
*Pectobacterium carotovorum* subsp. *carotovorum* PC1  
*Pediococcus pentosaceus* ATCC 25745  
*Photobacterium profundum* SS9  
*Photorhabdus asymbiotica*  
*Polynucleobacter necessarius* subsp. *asymbioticus* QLW-P1DMWA-1  
*Polynucleobacter necessarius* subsp. *necessarius* STIR1  
*Propionibacterium acnes* KPA171202  
*Proteus mirabilis* HI4320  
*Pseudoalteromonas atlantica* T6c  
*Pseudoalteromonas haloplanktis* TAC125  
*Pseudomonas fluorescens* SBW25  
*Pseudomonas mendocina* ymp  
*Pseudomonas stutzeri* A1501  
*Ralstonia solanacearum* GMI1000  
*Rhizobium* sp. NGR234  
*Rhodococcus erythropolis* PR4  
*Rhodococcus jostii* RHA1  
*Rhodococcus opacus* B4  
*Rhodospirillum centenum* SW  
*Rickettsia akari* str. Hartford  
*Rickettsia canadensis* str. McKiel  
*Rickettsia felis* URRWXCal2  
*Rickettsia massiliae* MTU5  
*Rickettsia peacockii* str. Rustic  
*Rickettsia prowazekii* str. Madrid E  
*Rickettsia typhi* str. Wilmington  
*Roseiflexus* sp. RS-1  
*Ruegeria* sp. TM1040  
*Salinispora arenicola* CNS-205  
*Serratia proteamaculans* 568  
*Shewanella frigidimarina* NCIMB 400  
*Shewanella putrefaciens* CN-32  
*Shigella dysenteriae* Sd197  
*Shigella sonnei* Ss046



Sinorhizobium medicae WSM419 (correct name Ensifer medicae)  
Sinorhizobium meliloti 1021 (correct name Ensifer meliloti)  
Sodalis glossinidius str. 'morsitans'  
Sorangium celluloseum 'So ce 56'  
Staphylococcus carnosus subsp. carnosus TM300  
Staphylococcus haemolyticus JCSC1435  
Streptococcus dysgalactiae subsp. equisimilis GGS\_124  
Streptococcus gordonii str. Challis substr. CH1  
Streptococcus mutans UA159  
Streptococcus sanguinis SK36  
Streptococcus uberis 0140J  
Streptomyces coelicolor A3(2)  
Streptomyces griseus subsp. griseus NBRC 13350  
Sulfolobus solfataricus P2  
Sulfurovum sp. NBC37-1  
Teredinibacter turnerae T7901  
Thauera sp. MZ1T  
Thermoanaerobacter sp. X514  
Thermobifida fusca YX  
Thermofilum pendens Hrk 5  
Thermosiphon africanus TCF52B  
Thermosynechococcus elongatus BP-1  
Thiobacillus denitrificans ATCC 25259  
Thiomicrospira crunogena XCL-2  
Trichodesmium erythraeum IMS101  
Ureaplasma urealyticum serovar 10 str. ATCC 33699  
Variovorax paradoxus S110  
Vibrio harveyi ATCC BAA-1116  
Vibrio parahaemolyticus RIMD 2210633  
Vibrio splendidus LGP32  
Wigglesworthia glossinidia endosymbiont of Glossina brevipalpis  
Xanthobacter autotrophicus Py2  
Xanthomonas axonopodis pv. citri str. 306  
Yersinia enterocolitica subsp. enterocolitica 8081  
Zymomonas mobilis subsp. mobilis ZM4

**C- Species names that have never been validly published, or belong to *candidatus* names:**

Acaryochloris marina MBIC11017  
Alkaliphilus metalliredigens QYMF  
Anaerocellum thermophilum DSM 6725  
Aquifex aeolicus VF5  
Aromatoleum aromaticum EbN1  
Baumannia cicadellinicola str. Hc (Homalodisca coagulata)  
Candidatus Amoebophilus asiaticus 5a2  
Candidatus Azobacteroides pseudotrichonymphae genomovar. CFP2  
Candidatus Blochmannia floridanus  
Candidatus Blochmannia pennsylvanicus str. BPEN  
Candidatus Carsonella ruddii PV  
Candidatus Desulfurudis audaxviator MP104C

Candidatus Hamiltonella defensa 5AT (Acyrtosiphon pisum)  
Candidatus Hodgkinia cicadicola Dsem  
Candidatus Korarchaeum cryptofilum OPF8  
Candidatus Koribacter versatilis Ellin345  
Candidatus Liberibacter asiaticus str. psy62  
Candidatus Methanoregula boonei 6A8  
Candidatus Pelagibacter ubique HTCC1062  
Candidatus Phytoplasma australiense  
Candidatus Phytoplasma mali  
Candidatus Protochlamydia amoebophila UWE25  
Candidatus Ruthia magnifica str. Cm (Calyptogena magnifica)  
Candidatus Solibacter usitatus Ellin6076  
Candidatus Sulcia muelleri GWSS  
Candidatus Vesicomysocius okutanii HA  
Chlorobium chlorochromatii CaD3  
Dechloromonas aromatica RCB  
Dehalococcoides ethenogenes 195  
Desulfococcus oleovorans Hxd3  
Desulfotomaculum reducens MI-1  
Elusimicrobium minutum Pei191  
Escherichia fergusonii ATCC 35469  
Geobacter lovleyi SZ  
Gramella forsetii KT0803  
Haemophilus somnus 129PT  
Heliobacterium modesticaldum Ice1  
Kosmotoga olearia TBF 19.5.1  
Magnetospirillum magneticum AMB-1  
Mannheimia succiniciproducens MBEL55E  
Methylophilum inferorum V4  
Nanoarchaeum equitans Kin4-M  
Nitrosopumilus maritimus SCM1  
Nostoc punctiforme PCC 73102  
Onion yellows phytoplasma OY-M  
Phenylobacterium zucineum HLK1  
Pseudomonas entomophila L48  
Pyrococcus abyssi GE5  
Sulfolobus islandicus L.S.2.15  
Sulfolobus islandicus M.14.25  
Sulfolobus islandicus M.16.27  
Sulfolobus islandicus M.16.4  
Sulfolobus islandicus Y.G.57.14  
Sulfolobus islandicus Y.N.15.51  
Thermococcus onnurineus NA1
