# Supplementary material
Source: PubMed Central journal article supplement (PMC2776425)
Supplement: 0906412106_ST3_PDF.pdf [file 0906412106_ST3_PDF.pdf]

Table S3: Results on pairwise comparisons of DDH, ANIm and TETRA used to construct the figure 2.

| Query Genome                            | Subject Genome                          | DDH (%) | ANIm (%) | Tetra   | ANib (%) |
|-----------------------------------------|-----------------------------------------|---------|----------|---------|----------|
| Bacillus cereus ATCC 10987              | Bacillus cereus ATCC 14579T             | 66,4    | 92,14    | 0,99892 | 90,93    |
| Bacillus cereus ATCC 14579T             | Bacillus cereus ATCC 10987              | 61,2    | 92,08    | 0,99892 | 90,87    |
| Bacteroides fragilis NCTC 9343          | Bacteroides fragilis YCH46              | 99,0    | 99,17    | 0,99947 | 98,65    |
| Bacteroides fragilis NCTC 9343          | Bacteroides thetaiotaomicron VPI-5482   | 21,0    | 84,31    | 0,96524 | 73,96    |
| Bacteroides fragilis YCH46              | Bacteroides fragilis NCTC 9343          | 99,0    | 99,17    | 0,99947 | 98,62    |
| Bacteroides thetaiotaomicron VPI-5482   | Bacteroides fragilis NCTC 9343          | 28,0    | 84,29    | 0,96524 | 74,29    |
| Brucella canis ATCC 23365               | Brucella melitensis ATCC 23457 biovar 2 | 99,0    | 99,64    | 0,99994 | 99,66    |
| Brucella canis ATCC 23365               | Brucella ovis ATCC 25840                | 94,0    | 99,57    | 0,9995  | 99,61    |
| Brucella canis ATCC 23365               | Brucella suis 1330                      | 100,0   | 99,87    | 0,99998 | 99,9     |
| Brucella melitensis ATCC 23457 biovar 2 | Brucella canis ATCC 23365               | 97,0    | 99,64    | 0,99994 | 99,68    |
| Brucella melitensis ATCC 23457 biovar 2 | Brucella ovis ATCC 25840                | 99,0    | 99,54    | 0,99961 | 99,58    |
| Brucella melitensis ATCC 23457 biovar 2 | Brucella suis 1330                      | 92,0    | 99,66    | 0,99995 | 99,7     |
| Brucella ovis ATCC 25840                | Brucella canis ATCC 23365               | 100,0   | 99,57    | 0,9995  | 99,54    |
| Brucella ovis ATCC 25840                | Brucella melitensis ATCC 23457 biovar 2 | 92,0    | 99,54    | 0,99961 | 99,51    |
| Brucella ovis ATCC 25840                | Brucella suis 1330                      | 100,0   | 99,6     | 0,99952 | 99,57    |
| Brucella suis 1330                      | Brucella canis ATCC 23365               | 100,0   | 99,87    | 0,99998 | 99,91    |
| Brucella suis 1330                      | Brucella melitensis ATCC 23457 biovar 2 | 100,0   | 99,66    | 0,99995 | 99,7     |
| Brucella suis 1330                      | Brucella ovis ATCC 25840                | 93,0    | 99,6     | 0,99952 | 99,63    |
| Brucella suis ATCC 23445 biovar 2       | Brucella melitensis ATCC 23457 biovar 2 | 96,0    | 99,6     | 0,99992 | 99,65    |
| Burkholderia cenocepacia AU1054         | Burkholderia vietnamiensis G4           | 36,5    | 90,28    | 0,98443 | 87,35    |
| Burkholderia cenocepacia AU1054         | Burkholderia xenovorans LB400T          | 14,8    | 84,94    | 0,85077 | 76,8     |
| Burkholderia cenocepacia HI2424         | Burkholderia cenocepacia J2315T         | 66,1    | 95,08    | 0,99950 | 93,84    |
| Burkholderia cenocepacia HI2424         | Burkholderia sp. ATCC 17760             | 45,4    | 91,76    | 0,99465 | 89,89    |
| Burkholderia cenocepacia HI2424         | Burkholderia vietnamiensis G4           | 37,7    | 90,29    | 0,98533 | 87,16    |
| Burkholderia cenocepacia HI2424         | Burkholderia xenovorans LB400T          | 12,5    | 85,03    | 0,85224 | 76,5     |
| Burkholderia cenocepacia J2315T         | Burkholderia cenocepacia HI2424         | 68,8    | 95,08    | 0,99950 | 93,86    |
| Burkholderia cenocepacia J2315T         | Burkholderia sp. ATCC 17760             | 55,8    | 91,96    | 0,99430 | 90,28    |
| Burkholderia cenocepacia J2315T         | Burkholderia vietnamiensis G4           | 37,0    | 90,43    | 0,98463 | 87,4     |
| Burkholderia cenocepacia J2315T         | Burkholderia xenovorans LB400T          | 13,0    | 85,03    | 0,84793 | 76,6     |
| Burkholderia sp. ATCC 17760             | Burkholderia cenocepacia HI2424         | 57,4    | 91,78    | 0,99465 | 89,77    |
| Burkholderia sp. ATCC 17760             | Burkholderia cenocepacia J2315T         | 54,5    | 91,95    | 0,99430 | 89,88    |

|                                  |                                  |      |       |         |       |
|----------------------------------|----------------------------------|------|-------|---------|-------|
| Burkholderia sp. ATCC 17760      | Burkholderia vietnamiensis G4    | 32,4 | 89,83 | 0,97493 | 86,31 |
| Burkholderia sp. ATCC 17760      | Burkholderia xenovorans LB400T   | 13,8 | 84,84 | 0,85275 | 76,1  |
| Burkholderia vietnamiensis G4    | Burkholderia cenocepacia AU1054  | 26,3 | 90,31 | 0,98443 | 87,56 |
| Burkholderia vietnamiensis G4    | Burkholderia cenocepacia HI2424  | 26,2 | 90,27 | 0,98533 | 87,52 |
| Burkholderia vietnamiensis G4    | Burkholderia cenocepacia J2315T  | 34,2 | 90,46 | 0,98463 | 87,54 |
| Burkholderia vietnamiensis G4    | Burkholderia sp. ATCC 17760      | 29,9 | 89,84 | 0,97493 | 86,94 |
| Burkholderia vietnamiensis G4    | Burkholderia xenovorans LB400T   | 9,0  | 84,87 | 0,85457 | 76,6  |
| Burkholderia xenovorans LB400T   | Burkholderia cenocepacia AU1054  | 11,8 | 84,81 | 0,85077 | 76,24 |
| Burkholderia xenovorans LB400T   | Burkholderia cenocepacia HI2424  | 12,7 | 84,80 | 0,85224 | 76,21 |
| Burkholderia xenovorans LB400T   | Burkholderia cenocepacia J2315T  | 13,7 | 84,80 | 0,84793 | 76,04 |
| Burkholderia xenovorans LB400T   | Burkholderia sp. ATCC 17760      | 12,6 | 84,73 | 0,85275 | 75,95 |
| Burkholderia xenovorans LB400T   | Burkholderia vietnamiensis G4    | 10,1 | 84,89 | 0,85457 | 76,15 |
| Chloroflexus aggregans DSM 9485  | Chloroflexus aurantiacus J-10-fl | 10,0 | 82,9  | 0,81308 | 74,12 |
| Chloroflexus aurantiacus J-10-fl | Chloroflexus aggregans DSM 9485  | 10,0 | 82,9  | 0,81308 | 74,11 |
| Deinococcus deserti VCD115       | Deinococcus radiodurans R1       | 17,0 | 84,13 | 0,76438 | 73,76 |
| Deinococcus radiodurans R1       | Deinococcus deserti VCD115       | 17,0 | 83,88 | 0,76438 | 74,04 |
| Escherichia coli CFT073          | Escherichia coli E2348/69        | 74,8 | 98,42 | 0,99938 | 97,62 |
| Escherichia coli CFT073          | Escherichia coli K-12 MG1655     | 89,0 | 97,16 | 0,99736 | 96,07 |
| Escherichia coli CFT073          | Escherichia coli O157 :H7 EDL933 | 78,2 | 96,67 | 0,99838 | 96,01 |
| Escherichia coli CFT073          | Escherichia coli O157 :H7 Sakai  | 85,5 | 96,72 | 0,99830 | 96    |
| Escherichia coli CFT073          | Escherichia coli O42             | 81,4 | 96,96 | 0,99913 | 95,9  |
| Escherichia coli CFT073          | Shigella flexneri 2a 2457T       | 66,9 | 97,10 | 0,99754 | 95,9  |
| Escherichia coli CFT073          | Shigella sonnei 53G              | 72,8 | 96,97 | 0,99616 | 95,93 |
| Escherichia coli E2348/69        | Escherichia coli CFT073          | 78,1 | 98,46 | 0,99938 | 97,85 |
| Escherichia coli E2348/69        | Escherichia coli K-12 MG1655     | 75,7 | 97,21 | 0,99794 | 96,39 |
| Escherichia coli E2348/69        | Escherichia coli O157 :H7 EDL933 | 74,2 | 96,83 | 0,99841 | 96,18 |
| Escherichia coli E2348/69        | Escherichia coli O157 :H7 Sakai  | 81,8 | 96,86 | 0,99838 | 96,23 |
| Escherichia coli E2348/69        | Escherichia coli O42             | 78,7 | 97,10 | 0,99928 | 96,14 |
| Escherichia coli E2348/69        | Shigella flexneri 2a 2457T       | 65,0 | 97,00 | 0,99721 | 96,09 |
| Escherichia coli E2348/69        | Shigella sonnei 53G              | 64,3 | 97,05 | 0,99558 | 96,01 |
| Escherichia coli K-12 MG1655     | Escherichia coli CFT073          | 95,7 | 97,15 | 0,99736 | 96,38 |
| Escherichia coli K-12 MG1655     | Escherichia coli E2348/69        | 75,5 | 97,22 | 0,99794 | 96,48 |
| Escherichia coli K-12 MG1655     | Escherichia coli O157 :H7 EDL933 | 78,8 | 98,01 | 0,99590 | 97,5  |

|                                  |                                  |       |       |         |       |
|----------------------------------|----------------------------------|-------|-------|---------|-------|
| Escherichia coli K-12 MG1655     | Escherichia coli O157 :H7 Sakai  | 84,8  | 98,06 | 0,99600 | 97,53 |
| Escherichia coli K-12 MG1655     | Escherichia coli O42             | 75,5  | 97,59 | 0,99808 | 96,83 |
| Escherichia coli K-12 MG1655     | Shigella flexneri 2a 2457T       | 63,4  | 98,32 | 0,99584 | 97,61 |
| Escherichia coli K-12 MG1655     | Shigella sonnei 53G              | 70,0  | 98,54 | 0,99294 | 97,8  |
| Escherichia coli O157 :H7 EDL933 | Escherichia coli CFT073          | 83,0  | 96,88 | 0,99838 | 96,04 |
| Escherichia coli O157 :H7 EDL933 | Escherichia coli E2348/69        | 78,2  | 96,87 | 0,99841 | 95,9  |
| Escherichia coli O157 :H7 EDL933 | Escherichia coli K-12 MG1655     | 79,7  | 98,04 | 0,99590 | 97,28 |
| Escherichia coli O157 :H7 EDL933 | Escherichia coli O157 :H7 Sakai  | 104,1 | 99,36 | 0,99997 | 99,68 |
| Escherichia coli O157 :H7 EDL933 | Escherichia coli O42             | 73,3  | 97,09 | 0,99888 | 95,91 |
| Escherichia coli O157 :H7 EDL933 | Shigella flexneri 2a 2457T       | 65,6  | 97,74 | 0,99581 | 96,66 |
| Escherichia coli O157 :H7 EDL933 | Shigella sonnei 53G              | 75,1  | 97,65 | 0,99646 | 96,77 |
| Escherichia coli O157 :H7 Sakai  | Escherichia coli CFT073          | 83,8  | 96,85 | 0,99830 | 95,85 |
| Escherichia coli O157 :H7 Sakai  | Escherichia coli E2348/69        | 77,1  | 96,90 | 0,99838 | 95,76 |
| Escherichia coli O157 :H7 Sakai  | Escherichia coli K-12 MG1655     | 75,9  | 98,05 | 0,99600 | 97,25 |
| Escherichia coli O157 :H7 Sakai  | Escherichia coli O157 :H7 EDL933 | 97,7  | 99,43 | 0,99997 | 99,63 |
| Escherichia coli O157 :H7 Sakai  | Escherichia coli O42             | 78,2  | 97,03 | 0,99888 | 95,84 |
| Escherichia coli O157 :H7 Sakai  | Shigella flexneri 2a 2457T       | 61,3  | 97,78 | 0,99584 | 96,54 |
| Escherichia coli O157 :H7 Sakai  | Shigella sonnei 53G              | 71,2  | 97,48 | 0,99647 | 96,57 |
| Escherichia coli O42             | Escherichia coli CFT073          | 84,5  | 96,94 | 0,99913 | 96,04 |
| Escherichia coli O42             | Escherichia coli E2348/69        | 71,4  | 97,06 | 0,99928 | 96,1  |
| Escherichia coli O42             | Escherichia coli K-12 MG1655     | 71,7  | 97,59 | 0,99808 | 96,75 |
| Escherichia coli O42             | Escherichia coli O157 :H7 EDL933 | 76,7  | 96,88 | 0,99888 | 96,26 |
| Escherichia coli O42             | Escherichia coli O157 :H7 Sakai  | 77,1  | 96,92 | 0,99888 | 96,27 |
| Escherichia coli O42             | Shigella flexneri 2a 2457T       | 64,4  | 97,42 | 0,99705 | 96,39 |
| Escherichia coli O42             | Shigella sonnei 53G              | 66,7  | 97,53 | 0,99639 | 96,1  |
| Methanococcus maripaludis C5     | Methanococcus maripaludis C6     | 69,0  | 91,7  | 0,9957  | 90,89 |
| Methanococcus maripaludis C5     | Methanococcus maripaludis C7     | 69,0  | 90,58 | 0,99655 | 89,75 |
| Methanococcus maripaludis C5     | Methanococcus vanniellii SB      | 17,0  | 83,19 | 0,96206 | 76,74 |
| Methanococcus maripaludis C6     | Methanococcus maripaludis C5     | 69,0  | 91,7  | 0,9957  | 90,9  |
| Methanococcus maripaludis C6     | Methanococcus maripaludis C7     | 81,0  | 90,83 | 0,99842 | 90,42 |
| Methanococcus maripaludis C6     | Methanococcus vanniellii SB      | 27,0  | 83,29 | 0,96209 | 76,84 |
| Methanococcus maripaludis C7     | Methanococcus maripaludis C5     | 69,0  | 90,58 | 0,99655 | 89,69 |
| Methanococcus maripaludis C7     | Methanococcus maripaludis C6     | 81,0  | 90,84 | 0,99842 | 90,44 |

|                                         |                                         |      |       |         |       |
|-----------------------------------------|-----------------------------------------|------|-------|---------|-------|
| Methanococcus maripaludis C7            | Methanococcus vannielii SB              | 32,0 | 83,69 | 0,96475 | 76,84 |
| Methanococcus vannielii SB              | Methanococcus maripaludis C5            | 17,0 | 83,18 | 0,96206 | 76,76 |
| Methanococcus vannielii SB              | Methanococcus maripaludis C6            | 27,0 | 83,26 | 0,96209 | 76,75 |
| Methanococcus vannielii SB              | Methanococcus maripaludis C7            | 32,0 | 83,68 | 0,96475 | 76,7  |
| Nitrosomonas europaea ATCC 19718        | Nitrosomas eutropha C91                 | 43,0 | 83,20 | 0,92544 | 78,88 |
| Nitrosomas eutropha C91                 | Nitrosomonas europaea ATCC 19718        | 43,0 | 83,20 | 0,92544 | 79,1  |
| Pseudomonas aeruginosa PAO1             | Pseudomonas fluorescens Pf-5            | 14,4 | 84,00 | 0,94314 | 75,75 |
| Pseudomonas aeruginosa PAO1             | Pseudomonas fluorescens PfO-1           | 13,9 | 83,85 | 0,91102 | 74,86 |
| Pseudomonas aeruginosa PAO1             | Pseudomonas fluorescens SBW25           | 14,7 | 83,78 | 0,91634 | 74,47 |
| Pseudomonas aeruginosa PAO1             | Pseudomonas syringae pv. Syringae B728a | 8,5  | 83,69 | 0,82041 | 73,92 |
| Pseudomonas aeruginosa PAO1             | Pseudomonas syringae pv. Tomato DC3000  | 6,3  | 83,55 | 0,80624 | 73,57 |
| Pseudomonas fluorescens Pf-5            | Pseudomonas aeruginosa PAO1             | 13,6 | 83,83 | 0,94314 | 75,5  |
| Pseudomonas fluorescens Pf-5            | Pseudomonas fluorescens PfO-1           | 25,8 | 85,76 | 0,92419 | 80,63 |
| Pseudomonas fluorescens Pf-5            | Pseudomonas fluorescens SBW25           | 29,6 | 85,54 | 0,94423 | 80,02 |
| Pseudomonas fluorescens Pf-5            | Pseudomonas syringae pv. Syringae B728a | 14,1 | 84,67 | 0,89445 | 76,89 |
| Pseudomonas fluorescens Pf-5            | Pseudomonas syringae pv. Tomato DC3000  | 11,2 | 84,44 | 0,88077 | 76,63 |
| Pseudomonas fluorescens PfO-1           | Pseudomonas aeruginosa PAO1             | 13,0 | 83,53 | 0,91102 | 74,73 |
| Pseudomonas fluorescens PfO-1           | Pseudomonas fluorescens Pf-5            | 29,4 | 85,80 | 0,91102 | 80,64 |
| Pseudomonas fluorescens PfO-1           | Pseudomonas fluorescens SBW25           | 32,4 | 85,92 | 0,94040 | 80,18 |
| Pseudomonas fluorescens PfO-1           | Pseudomonas syringae pv. Syringae B728a | 19,1 | 84,79 | 0,93312 | 77,01 |
| Pseudomonas fluorescens PfO-1           | Pseudomonas syringae pv. Tomato DC3000  | 15,3 | 84,46 | 0,92287 | 76,95 |
| Pseudomonas fluorescens SBW25           | Pseudomonas aeruginosa PAO1             | 10,5 | 83,46 | 0,91634 | 74,27 |
| Pseudomonas fluorescens SBW25           | Pseudomonas fluorescens Pf-5            | 24,9 | 85,78 | 0,94423 | 79,97 |
| Pseudomonas fluorescens SBW25           | Pseudomonas fluorescens PfO-1           | 26,3 | 83,46 | 0,91634 | 80,14 |
| Pseudomonas fluorescens SBW25           | Pseudomonas syringae pv. Syringae B728a | 14,8 | 84,80 | 0,90054 | 76,59 |
| Pseudomonas fluorescens SBW25           | Pseudomonas syringae pv. Tomato DC3000  | 11,7 | 84,55 | 0,89930 | 76,33 |
| Pseudomonas syringae pv. Syringae B728a | Pseudomonas aeruginosa PAO1             | 7,6  | 83,26 | 0,82041 | 73,64 |
| Pseudomonas syringae pv. Syringae B728a | Pseudomonas fluorescens Pf-5            | 12,7 | 85,05 | 0,89445 | 76,62 |
| Pseudomonas syringae pv. Syringae B728a | Pseudomonas fluorescens PfO-1           | 16,7 | 84,64 | 0,93312 | 76,66 |
| Pseudomonas syringae pv. Syringae B728a | Pseudomonas fluorescens SBW25           | 18,0 | 84,78 | 0,90054 | 76,47 |
| Pseudomonas syringae pv. Syringae B728a | Pseudomonas syringae pv. Tomato DC3000  | 37,8 | 87,98 | 0,99094 | 85,46 |
| Pseudomonas syringae pv. Tomato DC3000  | Pseudomonas aeruginosa PAO1             | 6,1  | 83,60 | 0,80624 | 73,61 |
| Pseudomonas syringae pv. Tomato DC3000  | Pseudomonas fluorescens Pf-5            | 10,5 | 84,74 | 0,88077 | 76,84 |

|                                               |                                                       |      |       |         |       |
|-----------------------------------------------|-------------------------------------------------------|------|-------|---------|-------|
| <i>Pseudomonas syringae</i> pv. Tomato DC3000 | <i>Pseudomonas fluorescens</i> PfO-1                  | 13,0 | 84,82 | 0,92287 | 76,91 |
| <i>Pseudomonas syringae</i> pv. Tomato DC3000 | <i>Pseudomonas fluorescens</i> SBW25                  | 15,7 | 84,68 | 0,89930 | 76,65 |
| <i>Pseudomonas syringae</i> pv. Tomato DC3000 | <i>Pseudomonas syringae</i> pv. <i>Syringae</i> B728a | 38,5 | 88,09 | 0,99094 | 85,73 |
| <i>Pyrobaculum aerophilum</i> str. IM2        | <i>Pyrobaculum calidifontis</i> JCM 11548             | 18,0 | 86,94 | 0,90901 | 69,45 |
| <i>Pyrobaculum aerophilum</i> str. IM2        | <i>Pyrobaculum islandicum</i> DSM 4184                | 3,0  | 93,79 | 0,92728 | 69,54 |
| <i>Pyrobaculum calidifontis</i> JCM 11548     | <i>Pyrobaculum aerophilum</i> str. IM2                | 18,0 | 86,95 | 0,90901 | 69,56 |
| <i>Pyrobaculum calidifontis</i> JCM 11548     | <i>Pyrobaculum islandicum</i> DSM 4184                | 1,0  | 86,99 | 0,94154 | 68,58 |
| <i>Pyrobaculum islandicum</i> DSM 4184        | <i>Pyrobaculum aerophilum</i> str. IM2                | 3,0  | 93,79 | 0,92728 | 69,48 |
| <i>Pyrobaculum islandicum</i> DSM 4184        | <i>Pyrobaculum calidifontis</i> JCM 11548             | 1,0  | 87,0  | 0,94154 | 68,54 |
| <i>Ralstonia eutropha</i> H16                 | <i>Ralstonia metallidurans</i> CH34                   | 28,0 | 85,73 | 0,94589 | 78,89 |
| <i>Ralstonia metallidurans</i> CH34           | <i>Ralstonia eutropha</i> H16                         | 28,0 | 85,74 | 0,94589 | 78,8  |
| <i>Salinibacter ruber</i> M31                 | <i>Salinibacter ruber</i> M8                          | 96,6 | 98,61 | 0,99961 | 98,54 |
| <i>Shewanella amazonensis</i> SB2B            | <i>Shewanella oneidensis</i> MR-1                     | 40,3 | 83,04 | 0,69611 | 70,91 |
| <i>Shewanella amazonensis</i> SB2B            | <i>Shewanella putrefaciens</i> CN-32                  | 42,7 | 82,26 | 0,64865 | 70,49 |
| <i>Shewanella amazonensis</i> SB2B            | <i>Shewanella woodyi</i> ATCC 51908                   | 40,0 | 83,11 | 0,64645 | 69,16 |
| <i>Shewanella baltica</i> OS155               | <i>Shewanella baltica</i> OS185                       | 99,0 | 96,86 | 0,99877 | 96,61 |
| <i>Shewanella baltica</i> OS155               | <i>Shewanella baltica</i> OS195                       | 99,0 | 96,78 | 0,99876 | 96,46 |
| <i>Shewanella baltica</i> OS155               | <i>Shewanella baltica</i> OS223                       | 99,0 | 97,07 | 0,99856 | 96,91 |
| <i>Shewanella baltica</i> OS155               | <i>Shewanella putrefaciens</i> CN-32                  | 11,0 | 86,67 | 0,9682  | 82,6  |
| <i>Shewanella baltica</i> OS155               | <i>Shewanella oneidensis</i> MR-1T                    | 25,7 | 85,84 | 0,97170 | 78,32 |
| <i>Shewanella baltica</i> OS155               | <i>Shewanella putrefaciens</i> CN-32                  | 26,1 | 86,87 | 0,96815 | 81,88 |
| <i>Shewanella baltica</i> OS185               | <i>Shewanella baltica</i> OS155                       | 99,0 | 96,89 | 0,99877 | 96,71 |
| <i>Shewanella baltica</i> OS195               | <i>Shewanella baltica</i> OS155                       | 99,0 | 96,81 | 0,99876 | 96,69 |
| <i>Shewanella baltica</i> OS223               | <i>Shewanella baltica</i> OS155                       | 99,0 | 97,1  | 0,99856 | 96,8  |
| <i>Shewanella halifaxensis</i> HAW-EB4        | <i>Shewanella pealeana</i> ATCC 700345                | 17,9 | 85,89 | 0,99389 | 82,26 |
| <i>Shewanella oneidensis</i> MR-1             | <i>Shewanella amazonensis</i> SB2B                    | 40,3 | 83,07 | 0,69611 | 70,75 |
| <i>Shewanella oneidensis</i> MR-1             | <i>Shewanella pealeana</i> ATCC 700345                | 20,4 | 83,21 | 0,9034  | 71,41 |
| <i>Shewanella oneidensis</i> MR-1             | <i>Shewanella putrefaciens</i> CN-32                  | 35,7 | 85,01 | 0,97839 | 79,27 |
| <i>Shewanella oneidensis</i> MR-1             | <i>Shewanella woodyi</i> ATCC 51908                   | 39,0 | 83,08 | 0,79654 | 71,14 |
| <i>Shewanella oneidensis</i> MR-1T            | <i>Shewanella baltica</i> OS155                       | 26,2 | 85,51 | 0,97170 | 78,52 |
| <i>Shewanella oneidensis</i> MR-1T            | <i>Shewanella putrefaciens</i> CN-32                  | 21,1 | 85,61 | 0,97843 | 78,63 |
| <i>Shewanella pealeana</i> ATCC 700345        | <i>Shewanella halifaxensis</i> HAW-EB4                | 17,9 | 85,9  | 0,99389 | 82,18 |
| <i>Shewanella pealeana</i> ATCC 700345        | <i>Shewanella oneidensis</i> MR-1                     | 20,4 | 83,24 | 0,9034  | 71,41 |

|                                   |                                   |      |       |         |       |
|-----------------------------------|-----------------------------------|------|-------|---------|-------|
| Shewanella putrefaciens CN-32     | Shewanella amazonensis SB2B       | 42,7 | 82.23 | 0.64865 | 70.46 |
| Shewanella putrefaciens CN-32     | Shewanella baltica OS155          | 11,0 | 86.68 | 0.9682  | 82.75 |
| Shewanella putrefaciens CN-32     | Shewanella oneidensis MR-1        | 35,7 | 85.01 | 0.97839 | 79.27 |
| Shewanella putrefaciens CN-32     | Shewanella baltica OS155          | 27,8 | 87,24 | 0,96815 | 81,9  |
| Shewanella putrefaciens CN-32     | Shewanella oneidensis MR-1T       | 22,1 | 85,66 | 0,97843 | 78,46 |
| Shewanella sediminis HAW-EB3      | Shewanella woodyi ATCC 51908      | 17,8 | 84.43 | 0.89651 | 75.25 |
| Shewanella woodyi ATCC 51908      | Shewanella amazonensis SB2B       | 40,0 | 83.17 | 0.64645 | 69.14 |
| Shewanella woodyi ATCC 51908      | Shewanella oneidensis MR-1        | 39,0 | 83.1  | 0.79654 | 70.96 |
| Shewanella woodyi ATCC 51908      | Shewanella sediminis HAW-EB3      | 17,8 | 84.42 | 0.89651 | 75.28 |
| Shigella flexneri 2a 2457T        | Escherichia coli CFT073           | 78,1 | 97,03 | 0,99754 | 96,4  |
| Shigella flexneri 2a 2457T        | Escherichia coli E2348/69         | 67,5 | 97,04 | 0,99721 | 96,31 |
| Shigella flexneri 2a 2457T        | Escherichia coli K-12 MG1655      | 72,8 | 98,32 | 0,99584 | 97,75 |
| Shigella flexneri 2a 2457T        | Escherichia coli O157 :H7 EDL933  | 70,0 | 97,63 | 0,99581 | 97,3  |
| Shigella flexneri 2a 2457T        | Escherichia coli O157 :H7 Sakai   | 70,5 | 97,67 | 0,99584 | 97,36 |
| Shigella flexneri 2a 2457T        | Escherichia coli O42              | 69,2 | 97,35 | 0,99705 | 96,7  |
| Shigella flexneri 2a 2457T        | Shigella sonnei 53G               | 78,4 | 98,63 | 0,99718 | 97,89 |
| Shigella sonnei 53G               | Escherichia coli CFT073           | 83,3 | 97,12 | 0,99616 | 96,2  |
| Shigella sonnei 53G               | Escherichia coli E2348/69         | 77,6 | 97,11 | 0,99558 | 96,2  |
| Shigella sonnei 53G               | Escherichia coli K-12 MG1655      | 79,2 | 98,43 | 0,99294 | 97,8  |
| Shigella sonnei 53G               | Escherichia coli O157 :H7 EDL933  | 73,6 | 97,58 | 0,99646 | 97,15 |
| Shigella sonnei 53G               | Escherichia coli O157 :H7 Sakai   | 76,8 | 97,59 | 0,99647 | 97,09 |
| Shigella sonnei 53G               | Escherichia coli O42              | 76,1 | 97,46 | 0,99639 | 96,55 |
| Shigella sonnei 53G               | Shigella flexneri 2a 2457T        | 81,0 | 98,50 | 0,99718 | 97,68 |
| Streptococcus agalactiae 2603 V/R | Streptococcus agalactiae A909     | 95,5 | 99,42 | 0,99897 | 98,78 |
| Streptococcus agalactiae 2603 V/R | Streptococcus agalactiae NEM 316  | 89,6 | 99,38 | 0,99803 | 98,36 |
| Streptococcus agalactiae A909     | Streptococcus agalactiae 2603 V/R | 91,4 | 99,43 | 0,99897 | 98,74 |
| Streptococcus agalactiae A909     | Streptococcus agalactiae NEM 316  | 92,8 | 99,33 | 0,99835 | 98,61 |
| Streptococcus agalactiae NEM 316  | Streptococcus agalactiae 2603 V/R | 83,1 | 99,40 | 0,99803 | 98,34 |
| Streptococcus agalactiae NEM 316  | Streptococcus agalactiae A909     | 88,5 | 99,30 | 0,99835 | 98,61 |
| Sulfolobus acidocaldarius DSM 639 | Sulfolobus solfataricus P2        | 2,8  | 89.24 | 0.75161 | 66.33 |
| Sulfolobus solfataricus P2        | Sulfolobus acidocaldarius DSM 639 | 6,3  | 89.22 | 0.75161 | 66.46 |
| Thermotoga maritima MSB8          | Thermotoga neapolitana DSM 4359   | 30,8 | 87.2  | 0.9608  | 80.01 |
| Thermotoga maritima MSB8          | Thermotoga petrophila RKU-1       | 16,9 | 95.27 | 0.99829 | 94.79 |

|                                 |                                 |      |       |         |       |
|---------------------------------|---------------------------------|------|-------|---------|-------|
| Thermotoga neapolitana DSM 4359 | Thermotoga maritima MSB8        | 30,8 | 87.2  | 0.9608  | 80.01 |
| Thermotoga neapolitana DSM 4359 | Thermotoga petrophila RKU-1     | 11,0 | 85.73 | 0.96351 | 78.96 |
| Thermotoga petrophila RKU-1     | Thermotoga maritima MSB8        | 16,9 | 95.27 | 0.99829 | 94.66 |
| Thermotoga petrophila RKU-1     | Thermotoga neapolitana DSM 4359 | 11,0 | 85.73 | 0.96351 | 79.05 |
