# Supplementary material
Source: PubMed Central journal article supplement (PMC2776425)
Supplement: 0906412106_ST4_PDF.pdf [file 0906412106_ST4_PDF.pdf]

Table S4: Results on 454 random partial sequences used for ANI and TETRA calculations.

|                                                       | Reads         | %              | Nuc<br>(no<br>tags) | %             | Average<br>read<br>length | Core of<br>unique<br>reads | %          |
|-------------------------------------------------------|---------------|----------------|---------------------|---------------|---------------------------|----------------------------|------------|
| <i>Vibrio scopthalmi</i> , A089 <sup>T</sup>          | 10195         | 8.03%          | 2298106             | 7.89%         | 225                       | 5590                       | 54.83<br>% |
| <i>V. scopthalmi</i> , A107                           | 8188          | 6.45%          | 1697910             | 5.83%         | 207                       | 4509                       | 55.07<br>% |
| <i>V. aestuarianus</i> , LMG 7909 <sup>T</sup>        | 9188          | 7.24%          | 2003909             | 6.88%         | 218                       | 4987                       | 54.28<br>% |
| <i>Aifella marina</i> DSM 2697 <sup>T</sup>           | 15752         | 12.41%         | 3480326             | 11.95<br>%    | 220                       | 9049                       | 57.45<br>% |
| <i>A. marina</i> C3                                   | 17203         | 13.55%         | 3834517             | 13.16<br>%    | 222                       | 10105                      | 58.74<br>% |
| DSM 11549                                             | 25426         | 20.03%         | 5635774             | 19.34<br>%    | 221                       | 14176                      | 55.75<br>% |
| <i>Rhodobium gokarnense</i> DSM<br>17935 <sup>T</sup> | 32899         | 25.92%         | 7440938             | 25.54<br>%    | 226                       | 17871                      | 54.32<br>% |
| <i>Escherichia coli</i> K12                           | 4359          | 3.43%          | 1014310             | 3.48%         | 232                       | 3158                       | 72.45<br>% |
| Reads w/o tag                                         | 3717          | 2.93%          |                     |               |                           |                            |            |
| Sum                                                   | <b>123210</b> | <b>100.00%</b> | <b>27405790</b>     | <b>94.06%</b> | <b>222</b>                |                            |            |
