# Supplementary material
Source: PubMed Central journal article supplement (PMC2776425)
Supplement: 0906412106_ST6_PDF.pdf [file 0906412106_ST6_PDF.pdf]

|                                                           | target | ANIm         | TETRA          |
|-----------------------------------------------------------|--------|--------------|----------------|
| <b>A- Results on the representative Buchnera strains:</b> |        |              |                |
| Buchnera aphidicola str. Tuc7 (Acyrtosiphon pisum)        | Tuc7   | /            | /              |
| Buchnera aphidicola str. 5A (Acyrtosiphon pisum)          | Tuc7   | <b>99.76</b> | <b>0.99987</b> |
| Buchnera aphidicola str. APS (Acyrtosiphon pisum)         | Tuc7   | <b>99.7</b>  | <b>0.9996</b>  |
| Buchnera aphidicola str. Bp (Baizongia pistaciae)         | Tuc7   | 86.43        | 0.88499        |
| Buchnera aphidicola str. Cc (Cinara cedri)                | Tuc7   | 84.61        | 0.95343        |
| Buchnera aphidicola str. Sg (Schizaphis graminum)         | Tuc7   | 83.26        | 0.97557        |
| Buchnera aphidicola str. Bp (Baizongia pistaciae)         | Bp     | /            | /              |
| Buchnera aphidicola str. 5A (Acyrtosiphon pisum)          | Bp     | 86.51        | 0.88429        |
| Buchnera aphidicola str. APS (Acyrtosiphon pisum)         | Bp     | 86.52        | 0.88594        |
| Buchnera aphidicola str. Cc (Cinara cedri)                | Bp     | 87.09        | 0.90186        |
| Buchnera aphidicola str. Sg (Schizaphis graminum)         | Bp     | 85.36        | 0.89126        |
| Buchnera aphidicola str. Tuc7 (Acyrtosiphon pisum)        | Bp     | 86.44        | 0.88499        |
| Buchnera aphidicola str. APS (Acyrtosiphon pisum)         | APS    | /            | /              |
| Buchnera aphidicola str. 5A (Acyrtosiphon pisum)          | APS    | <b>99.75</b> | <b>0.99966</b> |
| Buchnera aphidicola str. Bp (Baizongia pistaciae)         | APS    | 86.5         | 0.88594        |
| Buchnera aphidicola str. Cc (Cinara cedri)                | APS    | 84.77        | 0.95309        |
| Buchnera aphidicola str. Sg (Schizaphis graminum)         | APS    | 83.26        | 0.97612        |
| Buchnera aphidicola str. Tuc7 (Acyrtosiphon pisum)        | APS    | <b>99.7</b>  | <b>0.9996</b>  |
| Buchnera aphidicola str. 5A (Acyrtosiphon pisum)          | 5A     | /            | /              |
| Buchnera aphidicola str. APS (Acyrtosiphon pisum)         | 5A     | <b>99.75</b> | <b>0.99966</b> |
| Buchnera aphidicola str. Bp (Baizongia pistaciae)         | 5A     | 86.49        | 0.88429        |
| Buchnera aphidicola str. Cc (Cinara cedri)                | 5A     | 84.6         | 0.95313        |
| Buchnera aphidicola str. Sg (Schizaphis graminum)         | 5A     | 83.18        | 0.97593        |
| Buchnera aphidicola str. Tuc7 (Acyrtosiphon pisum)        | 5A     | <b>99.76</b> | <b>0.99987</b> |
| Buchnera aphidicola str. Sg (Schizaphis graminum)         | Sg     | /            | /              |
| Buchnera aphidicola str. 5A (Acyrtosiphon pisum)          | Sg     | 83.15        | 0.97593        |
| Buchnera aphidicola str. APS (Acyrtosiphon pisum)         | Sg     | 83.22        | 0.97612        |
| Buchnera aphidicola str. Bp (Baizongia pistaciae)         | Sg     | 85.31        | 0.89126        |
| Buchnera aphidicola str. Cc (Cinara cedri)                | Sg     | 84.32        | 0.93257        |
| Buchnera aphidicola str. Tuc7 (Acyrtosiphon pisum)        | Sg     | 83.22        | 0.97557        |
| Buchnera aphidicola str. Cc (Cinara cedri)                | Cc     | /            | /              |
| Buchnera aphidicola str. 5A (Acyrtosiphon pisum)          | Cc     | 84.59        | 0.95313        |
| Buchnera aphidicola str. APS (Acyrtosiphon pisum)         | Cc     | 84.76        | 0.95309        |
| Buchnera aphidicola str. Bp (Baizongia pistaciae)         | Cc     | 87.06        | 0.90186        |
| Buchnera aphidicola str. Sg (Schizaphis graminum)         | Cc     | 84.34        | 0.93257        |
| Buchnera aphidicola str. Tuc7 (Acyrtosiphon pisum)        | Cc     | 84.61        | 0.95343        |

**B- Results on the Wolbachia spp. strains:**

|                                                      |            |                |              |
|------------------------------------------------------|------------|----------------|--------------|
| Wolbachia endosymbiont of Culex quinquefasciatus Pel | Culex      | /              | /            |
| Wolbachia endosymbiont of Drosophila melanogaster    | Culex      | 87.45          | 0.93317      |
| Wolbachia endosymbiont strain TRS of Brugia malayi   | Culex      | 84.9           | 0.96544      |
| Wolbachia sp. wRi                                    | Culex      | 87.47          | 0.93569      |
| Wolbachia endosymbiont of Culex quinquefasciatus Pel | Drosophila | 0.93317        | 87.49        |
| Wolbachia endosymbiont of Drosophila melanogaster    | Drosophila | /              | /            |
| Wolbachia endosymbiont strain TRS of Brugia malayi   | Drosophila | 0.95175        | 85.69        |
| Wolbachia sp. wRi (infects Drosophila simulans)      | Drosophila | <b>0.99246</b> | <b>97.09</b> |

#### C- Results on the Neisseria spp. strains:

|                                 |         |              |                |
|---------------------------------|---------|--------------|----------------|
| Neisseria gonorrhoeae FA 1090   | FA 1090 | /            | /              |
| Neisseria gonorrhoeae NCCP11945 | FA 1090 | <b>99.09</b> | <b>0.99975</b> |
| Neisseria meningitidis 053442   | FA 1090 | 94.77        | 0.99338        |
| Neisseria meningitidis FAM18    | FA 1090 | 94.82        | 0.9936         |
| Neisseria meningitidis MC58     | FA 1090 | 94.76        | 0.99361        |
| Neisseria meningitidis Z2491    | FA 1090 | 94.74        | 0.9932         |
| Neisseria meningitidis 053442   | O53442  | /            | /              |
| Neisseria gonorrhoeae FA 1090   | O53442  | 94.77        | 0.99338        |
| Neisseria gonorrhoeae NCCP11945 | O53442  | 94.76        | 0.99399        |
| Neisseria meningitidis FAM18    | O53442  | <b>97.28</b> | <b>0.99973</b> |
| Neisseria meningitidis MC58     | O53442  | <b>97.11</b> | <b>0.99967</b> |
| Neisseria meningitidis Z2491    | O53442  | <b>97.18</b> | <b>0.99967</b> |

#### D- Results on the Burkholderia mallei and B. pseudomallei group

|                                   |            |              |                |
|-----------------------------------|------------|--------------|----------------|
| Burkholderia mallei ATCC 23344    | ATCC 23344 | /            | /              |
| Burkholderia mallei NCTC 10247    | ATCC 23344 | <b>99.87</b> | <b>0.99997</b> |
| Burkholderia mallei SAVP1         | ATCC 23344 | <b>99.85</b> | <b>0.99989</b> |
| Burkholderia mallei NCTC 10229    | ATCC 23344 | <b>99.82</b> | <b>0.99997</b> |
| Burkholderia pseudomallei 1106a   | ATCC 23344 | <b>98.49</b> | <b>0.9988</b>  |
| Burkholderia pseudomallei K96243  | ATCC 23344 | <b>98.51</b> | <b>0.99865</b> |
| Burkholderia pseudomallei 668     | ATCC 23344 | <b>98.33</b> | <b>0.99891</b> |
| Burkholderia pseudomallei MSHR346 | ATCC 23344 | <b>98.8</b>  | <b>0.99742</b> |
| Burkholderia pseudomallei 1710b   | ATCC 23344 | <b>98.45</b> | <b>0.99854</b> |

#### E- Results on the Bordetella pertussis, B. parapertussis and B. bronchiseptica group

|                                |      |              |               |
|--------------------------------|------|--------------|---------------|
| Bordetella bronchiseptica RB50 | RB50 | /            | /             |
| Bordetella parapertussis 12822 | RB50 | <b>99.34</b> | <b>0.9998</b> |

Bordetella pertussis Tohama I

RB50

**98.74**

**0.99351**
